# Supplementary material for: Sporulaminals A and B: a pair of unusual epimeric spiroaminal derivatives from a marine-derived fungus Paraconiothyrium sporulosum YK-03
Source: Royal Society of Chemistry journal article supplement (doi:10.1039/c6ra01401a), 2016-01-01

## Supporting Information

### **Sporulaminals A and B: a Pair of Unusual Epimeric Spiroaminal Derivatives from a Marine-Derived Fungus *Paraconiothyrium sporulosum* YK-03**

Li-Hua Zhang,<sup>ab</sup> Bao-Min Feng,<sup>c</sup> Gang Chen,<sup>ab</sup> Sheng-Ge Li,<sup>ab</sup> Yi Sun,<sup>d</sup> Hong-Hua  
Wu,<sup>e</sup> Jiao Bai,<sup>ab</sup> Hui-Ming Hua,<sup>ab</sup> Hai-Feng Wang,<sup>\*ab</sup> and Yue-Hu Pei<sup>\*ab</sup>

<sup>a</sup> Key Laboratory of Structure-Based Drug Design & Discovery, Ministry of  
Education, Shenyang Pharmaceutical University, Shenyang 110016, PR China

<sup>b</sup> School of Traditional Chinese MateriaMedica, Shenyang Pharmaceutical University,  
Shenyang 110016, PR China

<sup>c</sup> School of Life Sciences and Biotechnology, Dalian University, Dalian 116622, PR  
China

<sup>d</sup> Institute of Chinese MateriaMedica, China Academy of Chinese Medical Sciences,  
Beijing 100700, PR China

<sup>e</sup> Tianjin State Key Laboratory of Modern Chinese Medicine, Institute of Traditional  
Chinese Medicine, Tianjin University of Traditional Chinese Medicine, Tianjin  
300193, PR China

\* To whom correspondence should be addressed. Tel. (fax): +86-24-23986483; e-mail:  
peiyueh@vip.163.com (Yue-Hu Pei); wanghaifeng0310@163.com (Hai-Feng Wang)

## List of Supporting Information

|                                                                                                                                      |    |
|--------------------------------------------------------------------------------------------------------------------------------------|----|
| Computational methods .....                                                                                                          | 4  |
| pH-, H <sub>2</sub> O- and temperature-dependent epimerization effect .....                                                          | 10 |
| Figure S7. HR ESI-TOF MS spectrum for the mixture of 1 and 2 in CH <sub>3</sub> OH .....                                             | 13 |
| Figure S8. <sup>1</sup> H NMR (600 MHz, DMSO- <i>d</i> <sub>6</sub> ) spectrum for the mixture of 1 and 2.....                       | 14 |
| Figure S9. <sup>13</sup> C NMR (100 MHz, DMSO- <i>d</i> <sub>6</sub> ) spectrum for the mixture of 1 and 2.....                      | 15 |
| Figure S10. HSQC (600 MHz, DMSO- <i>d</i> <sub>6</sub> ) spectrum for the mixture of 1 and 2.....                                    | 16 |
| Figure S11. HMBC (600 MHz, DMSO- <i>d</i> <sub>6</sub> ) spectrum for the mixture of 1 and 2.....                                    | 17 |
| Figure S12. NOESY (600 MHz, DMSO- <i>d</i> <sub>6</sub> ) spectrum for the mixture of 1 and 2 .....                                  | 18 |
| Figure S13. HR ESI-TOF MS spectrum of compound 1 in CH <sub>3</sub> OH .....                                                         | 19 |
| Figure S14. <sup>1</sup> H NMR (600 MHz, DMSO- <i>d</i> <sub>6</sub> ) spectrum of compound 1 .....                                  | 20 |
| Figure S15. <sup>13</sup> C NMR (150 MHz, DMSO- <i>d</i> <sub>6</sub> ) spectrum of compound 1.....                                  | 21 |
| Figure S16. The HSQC correlations of compound 1 in HSQC (600 MHz, DMSO- <i>d</i> <sub>6</sub> )<br>spectrum of the 1/2 mixture ..... | 22 |
| Figure S17. The HMBC correlations of compound 1 in HMBC (600 MHz, DMSO- <i>d</i> <sub>6</sub> )<br>spectrum of the 1/2 mixture ..... | 23 |
| Figure S18. NOESY (600 MHz, DMSO- <i>d</i> <sub>6</sub> ) spectrum of compound 1.....                                                | 24 |
| Figure S19. IR spectrum of compound 1 .....                                                                                          | 25 |
| Figure S20. UV spectrum of compound 1 .....                                                                                          | 26 |
| Figure S21. CD spectrum of compound 1 .....                                                                                          | 27 |
| Figure S22. HR ESI-TOF MS spectrum of compound 2 in CH <sub>3</sub> OH .....                                                         | 28 |
| Figure S23. <sup>1</sup> H NMR (600 MHz, DMSO- <i>d</i> <sub>6</sub> ) spectrum of compound 2.....                                   | 29 |
| Figure S24. <sup>13</sup> C NMR (150 MHz, DMSO- <i>d</i> <sub>6</sub> ) spectrum of compound 2.....                                  | 30 |
| Figure S25. The HSQC correlations of compound 2 in HSQC (600 MHz, DMSO- <i>d</i> <sub>6</sub> )<br>spectrum of the 1/2 mixture ..... | 31 |
| Figure S26. The HMBC correlations of compound 2 in HMBC (600 MHz, DMSO- <i>d</i> <sub>6</sub> )<br>spectrum of the 1/2 mixture ..... | 32 |
| Figure S27. NOESY spectrum (600 MHz, DMSO- <i>d</i> <sub>6</sub> ) of compound 2.....                                                | 33 |
| Figure S28. IR spectrum of compound 2 .....                                                                                          | 34 |

|                                             |    |
|---------------------------------------------|----|
| Figure S29. UV spectrum of compound 2 ..... | 35 |
| Figure S30. CD spectrum of compound 2 ..... | 36 |

## Computational methods

Relative configurations of **1** and **2** were deduced from their NOESY data.

Compound **1**: Stochastic conformational searches were firstly conducted under MMFF94 force field for **1a** (2*S*, 4*R*, 6*S*, 7*S*, 9*S*), which gave two conformers. Their difference was that the orientation of methyl of the lactam ring was different. Conformers were optimized at the B3LYP/6-31G(d) basis set level in methanol and the frequencies were calculated by further time-dependent density functional theory (TDDFT) method, showing that these two conformers combined into one stable conformer, which was identical to the conformer of X-ray crystallographic analysis of compound **1**.

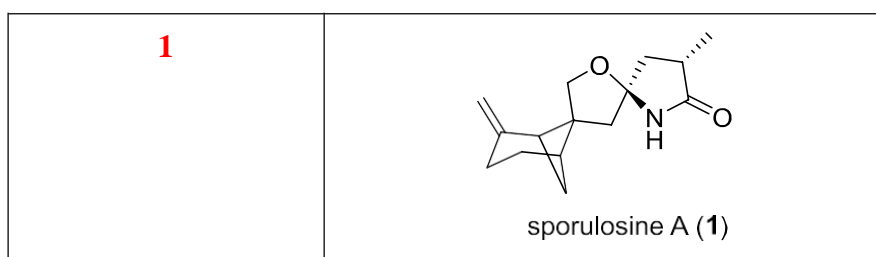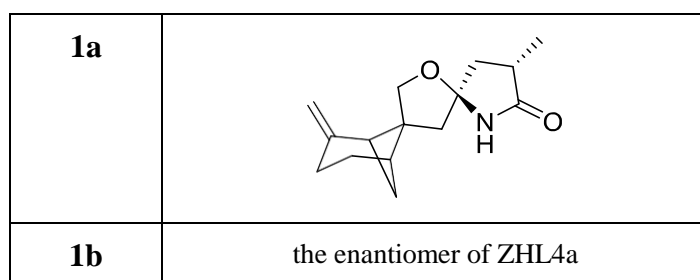

Stable conformer of **1a** in MeOH:

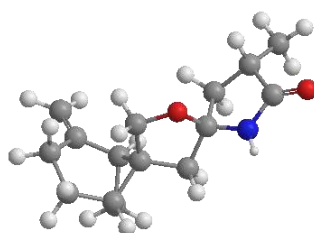

Using the conformers at the B3LYP/6-31G(d) basis set level in methanol, forty excitation states at the B3LYP/6-31G(d) basis set level were calculated, peak stretcher

was 0.4eV, and finally the calculation results were Boltzmann averaged to yield the depicted electronic circular dichroism (ECD) spectra of **1**, which was identical to the calculation results at the cam-B3LYP/6-31G(d) basis set level. All calculations were performed by Gaussian 09 program package (Version C.01).

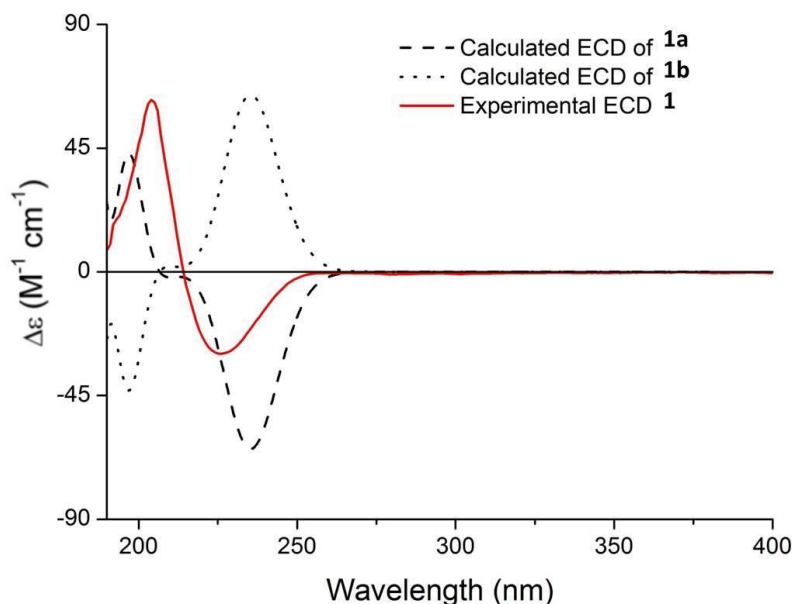

**Figure S1.** Calculated and experimental ECD spectra of **1**

Compound **2**: The Spartan 14.0 (Wavefunction Inc., Irvine, CA, USA) search using molecular mechanics MMFF was performed for **2a** (2S, 4S, 6S, 7S, 9S), which gave 100 conformers. The low-energy conformers of **2a** accounting for more than 5% Boltzmann distribution were further optimized successively in the gas phase by semi-empirical method in Gaussian 09 program package, which were reoptimized and analysed frequency, orderly, using the density functional theory (DFT) at the B3LYP/6-31G (d, p) level and the same way in the methanol, resulted in no imaginary frequencies. Solvent effects were taken into consideration by using the conductor polarizable continuum model (CPCM). The conformers of **2a** were calculated electronic circular dichroism (ECD) by the time-dependent density functional theory (TD-DFT) method at the B3LYP/6-31++G (d, p) level with the CPCM model in methanol solution. The overall calculated ECD curves of **2a** were generated by Boltzmann weighting of their selected low-energy conformers using SpecDis 1.51 with  $\sigma = 0.12\text{eV}$  at -8nm shift.

**Table S1** Energy analysis of **2a**

| Label | MMFF      |                |                 |
|-------|-----------|----------------|-----------------|
|       | E(kJ/mol) | rel. E(kJ/mol) | Boltzmann Dist. |
| 2a-1  | -3.64     | 0.00           | 0.554           |
| 2a-2  | -3.10     | 0.54           | 0.446           |

**Table S2** Computational methods for ECD of **2a****2a-1** Standard orientation:

| Center Number | Atomic Number | Atomic Type | Coordinates (Angstroms) |           |           |
|---------------|---------------|-------------|-------------------------|-----------|-----------|
|               |               |             | X                       | Y         | Z         |
| 1             | 6             | 0           | 3.143606                | 0.845033  | -0.593609 |
| 2             | 6             | 0           | 3.707414                | -0.453570 | -0.006880 |
| 3             | 6             | 0           | 2.519355                | -1.429386 | -0.107791 |
| 4             | 6             | 0           | 1.257225                | -0.538567 | -0.174019 |
| 5             | 8             | 0           | 0.762872                | -0.243800 | 1.146697  |
| 6             | 6             | 0           | 0.057513                | -1.134857 | -0.929951 |
| 7             | 6             | 0           | -1.179354               | -0.630413 | -0.167682 |
| 8             | 6             | 0           | -0.626302               | -0.589884 | 1.256840  |
| 9             | 6             | 0           | 4.213674                | -0.208949 | 1.424057  |
| 10            | 8             | 0           | 3.774911                | 1.863295  | -0.856479 |
| 11            | 7             | 0           | 1.797321                | 0.678435  | -0.760576 |
| 12            | 6             | 0           | -1.859827               | 0.647478  | -0.805980 |
| 13            | 6             | 0           | -2.734428               | 1.312146  | 0.228141  |
| 14            | 6             | 0           | -3.875824               | 0.432442  | 0.720212  |
| 15            | 6             | 0           | -3.560220               | -1.085279 | 0.608303  |
| 16            | 6             | 0           | -2.515529               | -1.359407 | -0.490538 |
| 17            | 6             | 0           | -2.699397               | -0.351880 | -1.660416 |
| 18            | 6             | 0           | -2.521355               | 2.555817  | 0.669831  |
| 19            | 1             | 0           | 4.547707                | -0.773735 | -0.631175 |
| 20            | 1             | 0           | 2.445190                | -2.121968 | 0.733439  |
| 21            | 1             | 0           | 2.586965                | -2.016359 | -1.028736 |
| 22            | 1             | 0           | 0.104279                | -2.228231 | -0.858487 |
| 23            | 1             | 0           | 0.083475                | -0.869985 | -1.988894 |
| 24            | 1             | 0           | -0.730035               | -1.576943 | 1.733942  |
| 25            | 1             | 0           | -1.107321               | 0.155316  | 1.895873  |

|    |   |   |           |           |           |
|----|---|---|-----------|-----------|-----------|
| 26 | 1 | 0 | 3.390022  | 0.084999  | 2.081852  |
| 27 | 1 | 0 | 4.966713  | 0.584213  | 1.434554  |
| 28 | 1 | 0 | 4.665631  | -1.119197 | 1.829102  |
| 29 | 1 | 0 | 1.211617  | 1.477602  | -0.966837 |
| 30 | 1 | 0 | -1.216944 | 1.366308  | -1.323570 |
| 31 | 1 | 0 | -4.163319 | 0.703939  | 1.740336  |
| 32 | 1 | 0 | -4.751058 | 0.647924  | 0.094038  |
| 33 | 1 | 0 | -4.482312 | -1.632475 | 0.383808  |
| 34 | 1 | 0 | -3.195903 | -1.476625 | 1.565247  |
| 35 | 1 | 0 | -2.450380 | -2.427085 | -0.726831 |
| 36 | 1 | 0 | -3.716593 | -0.059078 | -1.935641 |
| 37 | 1 | 0 | -2.164792 | -0.662446 | -2.560487 |
| 38 | 1 | 0 | -1.721706 | 3.171927  | 0.266835  |
| 39 | 1 | 0 | -3.144061 | 3.002567  | 1.440813  |

-----

**2a-2** Standard orientation:

| Center<br>Number | Atomic<br>Number | Atomic<br>Type | Coordinates (Angstroms) |           |           |
|------------------|------------------|----------------|-------------------------|-----------|-----------|
|                  |                  |                | X                       | Y         | Z         |
| 1                | 6                | 0              | 3.143606                | 0.845033  | -0.593609 |
| 2                | 6                | 0              | 3.707413                | -0.453570 | -0.006880 |
| 3                | 6                | 0              | 2.519355                | -1.429386 | -0.107792 |
| 4                | 6                | 0              | 1.257225                | -0.538567 | -0.174020 |
| 5                | 8                | 0              | 0.762872                | -0.243800 | 1.146697  |
| 6                | 6                | 0              | 0.057512                | -1.134858 | -0.929951 |
| 7                | 6                | 0              | -1.179354               | -0.630413 | -0.167682 |
| 8                | 6                | 0              | -0.626302               | -0.589884 | 1.256840  |
| 9                | 6                | 0              | 4.213674                | -0.208949 | 1.424057  |
| 10               | 8                | 0              | 3.774910                | 1.863295  | -0.856478 |
| 11               | 7                | 0              | 1.797321                | 0.678435  | -0.760577 |
| 12               | 6                | 0              | -1.859827               | 0.647478  | -0.805981 |
| 13               | 6                | 0              | -2.734428               | 1.312146  | 0.228141  |
| 14               | 6                | 0              | -3.875823               | 0.432442  | 0.720213  |
| 15               | 6                | 0              | -3.560219               | -1.085279 | 0.608304  |
| 16               | 6                | 0              | -2.515529               | -1.359407 | -0.490538 |
| 17               | 6                | 0              | -2.699398               | -0.351881 | -1.660415 |
| 18               | 6                | 0              | -2.521354               | 2.555817  | 0.669830  |
| 19               | 1                | 0              | 4.547707                | -0.773735 | -0.631175 |
| 20               | 1                | 0              | 2.445190                | -2.121968 | 0.733438  |
| 21               | 1                | 0              | 2.586966                | -2.016358 | -1.028736 |
| 22               | 1                | 0              | 0.104279                | -2.228232 | -0.858487 |
| 23               | 1                | 0              | 0.083475                | -0.869986 | -1.988894 |

|    |   |   |           |           |           |
|----|---|---|-----------|-----------|-----------|
| 24 | 1 | 0 | -0.730036 | -1.576942 | 1.733942  |
| 25 | 1 | 0 | -1.107322 | 0.155317  | 1.895872  |
| 26 | 1 | 0 | 3.390022  | 0.084999  | 2.081852  |
| 27 | 1 | 0 | 4.966712  | 0.584213  | 1.434554  |
| 28 | 1 | 0 | 4.665632  | -1.119197 | 1.829102  |
| 29 | 1 | 0 | 1.211616  | 1.477601  | -0.966837 |
| 30 | 1 | 0 | -1.216944 | 1.366308  | -1.323572 |
| 31 | 1 | 0 | -4.163318 | 0.703940  | 1.740337  |
| 32 | 1 | 0 | -4.751058 | 0.647924  | 0.094039  |
| 33 | 1 | 0 | -4.482312 | -1.632475 | 0.383810  |
| 34 | 1 | 0 | -3.195902 | -1.476624 | 1.565248  |
| 35 | 1 | 0 | -2.450380 | -2.427085 | -0.726830 |
| 36 | 1 | 0 | -3.716594 | -0.059079 | -1.935640 |
| 37 | 1 | 0 | -2.164793 | -0.662447 | -2.560487 |
| 38 | 1 | 0 | -1.721705 | 3.171927  | 0.266833  |
| 39 | 1 | 0 | -3.144059 | 3.002568  | 1.440812  |

---

## References

[1] Frisch, M. J.; Trucks, G. W.; Schlegel, H. B.; Scuseria, G. E.; Robb, M. A.; Cheeseman, J. R.; Scalmani, G.; Barone, V.; Mennucci, B.; Petersson, G. A.; Nakatsuji, H.; Caricato, M.; Li, X.; Hratchian, H. P.; Izmaylov, A. F.; Bloino, J.; Zheng, G.; Sonnenberg, J. L.; Hada, M.; Ehara, M.; Toyota, K.; Fukuda, R.; Hasegawa, J.; Ishida, M.; Nakajima, T.; Honda, Y.; Kitao, O.; Nakai, H.; Vreven, T.; Montgomery, J. A., Jr.; Peralta, J. E.; Ogliaro, F.; Bearpark, M.; Heyd, J. J.; Brothers, E.; Kudin, K. N.; Staroverov, V.N.; Kobayashi, R.; Normand, J.; Raghavachari, K.; Rendell, A.; Burant, J. C.; Iyengar, S. S.; Tomasi, J.; Cossi, M.; Rega, N.; Millam, J. M.; Klene, M.; Knox, J. E.; Cross, J. B.; Bakken, V.; Adamo, C.; Jaramillo, J.; Gomperts, R.; Stratmann, R. E.; Yazyev, O.; Austin, A. J.; Cammi, R.; Pomelli, C.; Ochterski, J. W.; Martin, R. L.; Morokuma, K.; Zakrzewski, V.G.; Voth, G. A.; Salvador, P.; Dannenberg, J.J.; Dapprich, S.; Daniels, A.D.; Farkas, O.; Foresman, J. B.; Ortiz, J. V.; Cioslowski, J.; Fox, D. J. Gaussian 09, Revision C1; Gaussian, Inc.: Wallingford, CT, 2010. [4]. Bruhn, T.; Hemberger, Y.; Schaumlöffel, A.; Bringmann, G. *Spec Dis*, version 1.51, University of Würzburg, Germany, 2010.



[2] Bruhn, T.; Schaumlöffel, A.; Hemberger, Y.; Bringmann, G. Quantifying the Comparison of Calculated and Experimental Electronic Circular Dichroism Spectra, *Chirality* 2013, 25, 243–249.

**Table S3.** 2D Structures of **2a**

| label | structure                                                                          |
|-------|------------------------------------------------------------------------------------|
| 2a    | 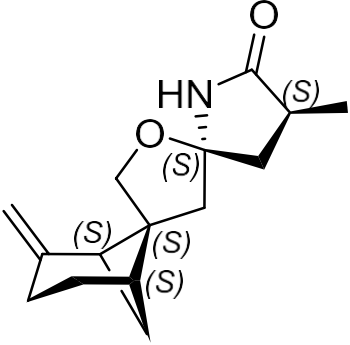 |

**Table S4** B3LYP/6-31++G (d, p) optimized lowest energy 3D conformers of **2a**.

| label | conformer                                                                            | Boltzmann weighting factors |
|-------|--------------------------------------------------------------------------------------|-----------------------------|
| 2a-1  | 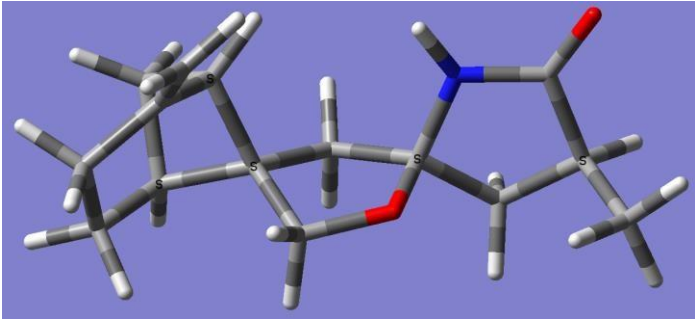 | 50.00                       |
| 2a-2  |  | 50.00                       |

**Figure S1** Calculated and experimental ECD spectra of **2a**.

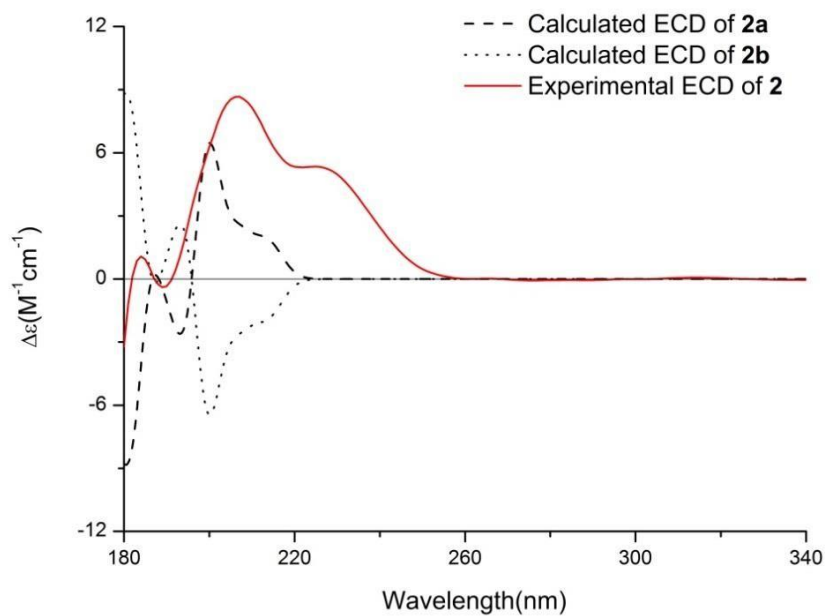

**Figure S2.** Calculated and experimental ECD spectra of **2**

*pH-, H<sub>2</sub>O- and temperature-dependent epimerization effect*

pH-dependent epimerization effect:

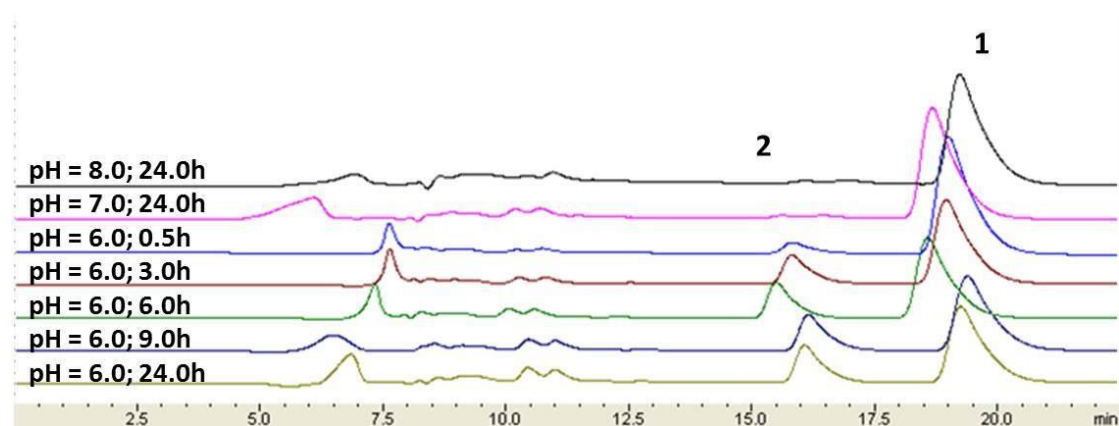

**Figure S3.** Dynamic chiral HPLC spectra of compound **1** dissolved in anhydrous ethanol at pH = 8.0, 7.0, 6.0.

Temperature-dependent epimerization effect:

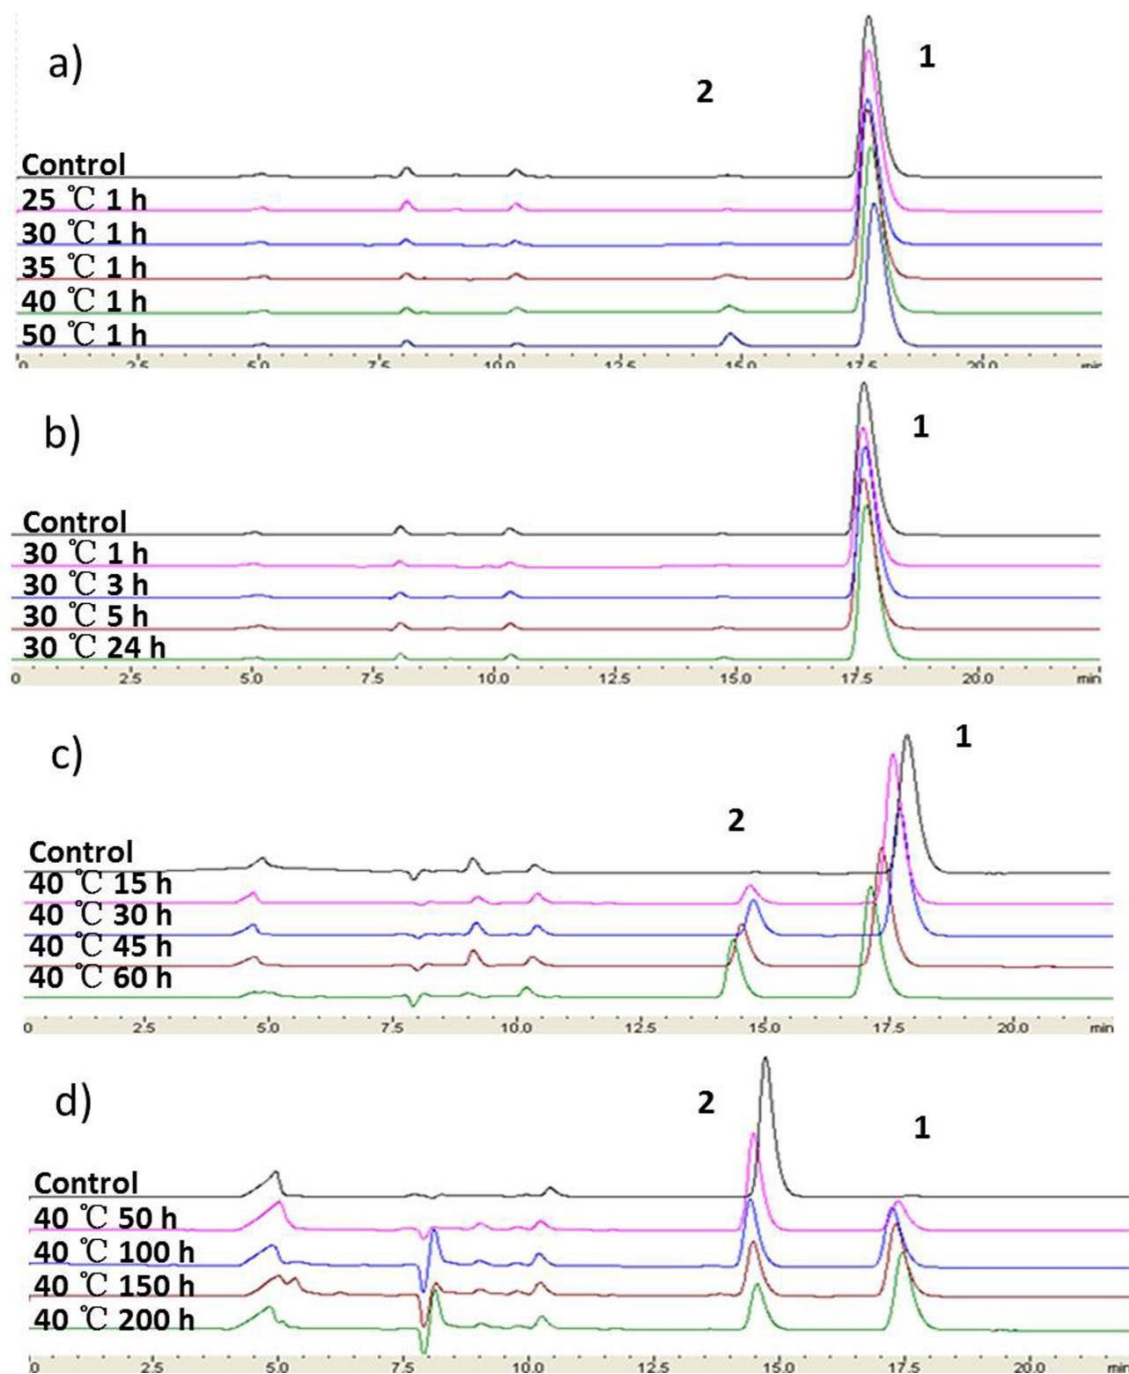

**Figure S4.** Dynamic chiral HPLC spectra: a) **1** dissolved in anhydrous ethanol heating at 25, 30, 35, 40, 50 °C; b) **1** dissolved in anhydrous ethanol heating at 30 °C; c) **1** dissolved in anhydrous ethanol heating at 40 °C; d) **2** dissolved in anhydrous ethanol heating at 40 °C

H<sub>2</sub>O-dependent epimerization effect:

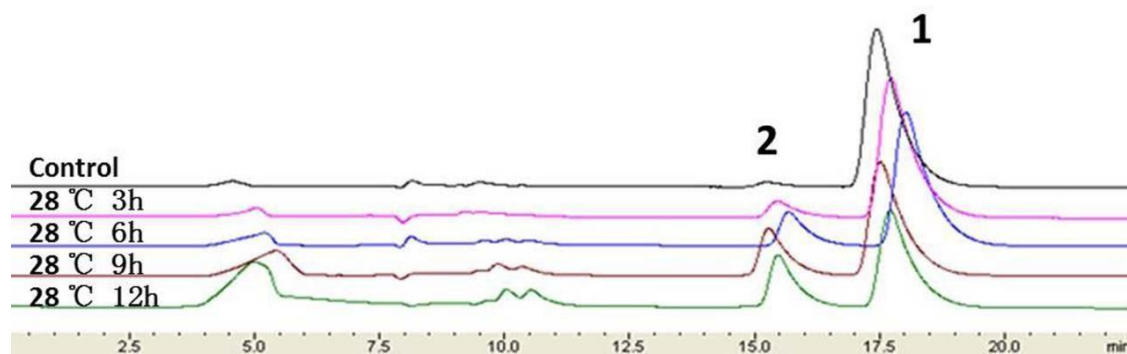

**Figure S5.** Dynamic chiral HPLC spectra of **1** dissolved in H<sub>2</sub>O heating at 28 °C

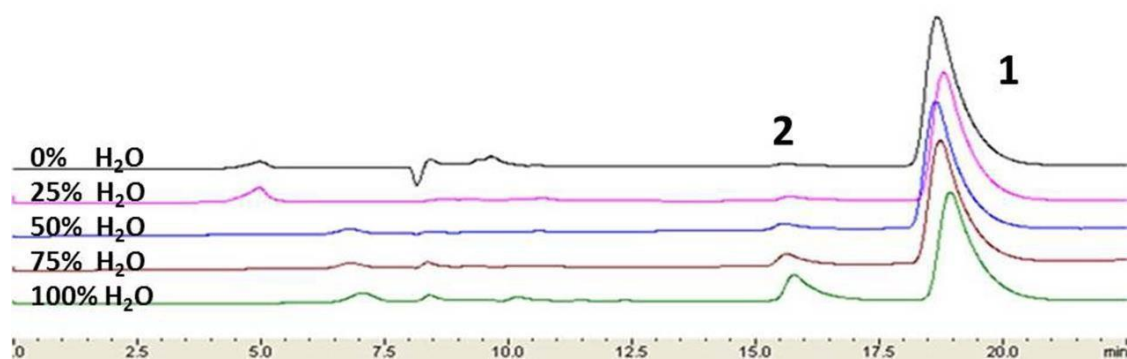

**Figure S6.** Chiral HPLC chromatogram of **1** dissolved in the mixed solution of Ethanol and H<sub>2</sub>O heating at 30 °C for 4h

**Figure S7. HR ESI-TOF MS spectrum for the mixture of 1 and 2 in CH<sub>3</sub>OH**

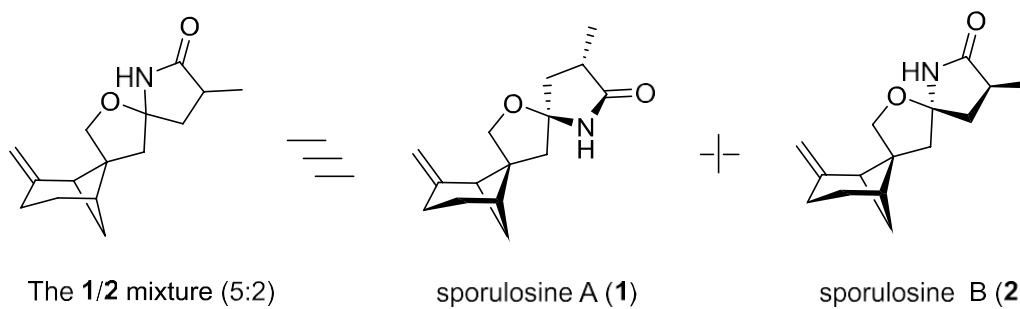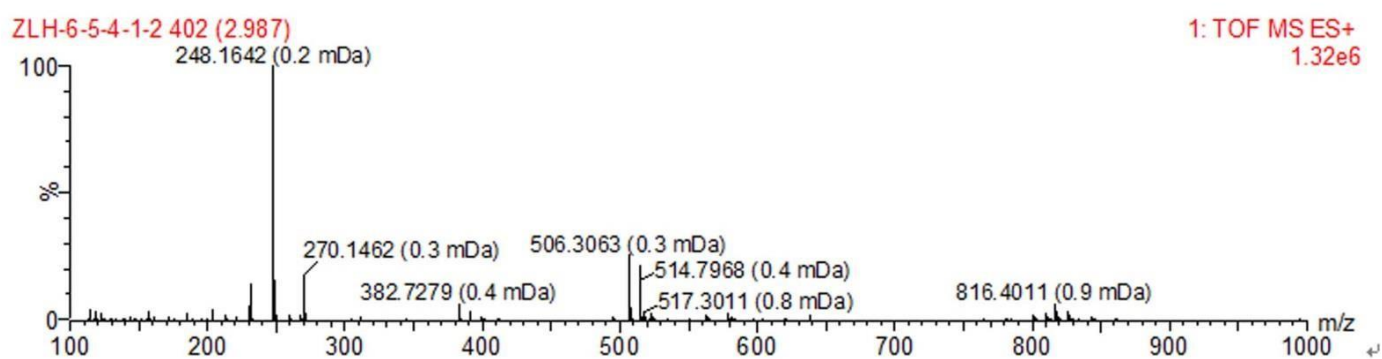

|     |          |                                                    |                     |
|-----|----------|----------------------------------------------------|---------------------|
| m/z | 248.1642 | C <sub>15</sub> H <sub>22</sub> NO <sub>2</sub>    | [M+H] <sup>+</sup>  |
| m/z | 270.1462 | C <sub>15</sub> H <sub>21</sub> NO <sub>2</sub> Na | [M+Na] <sup>+</sup> |

**Figure S8.  $^1\text{H}$  NMR (600 MHz,  $\text{DMSO-}d_6$ ) spectrum for the mixture of 1 and 2**

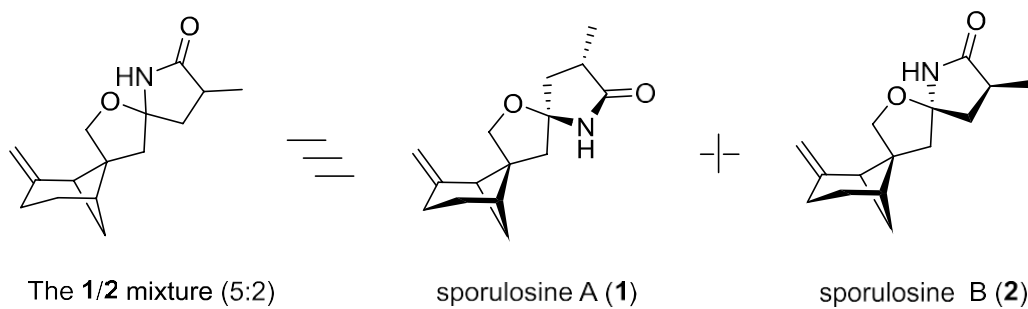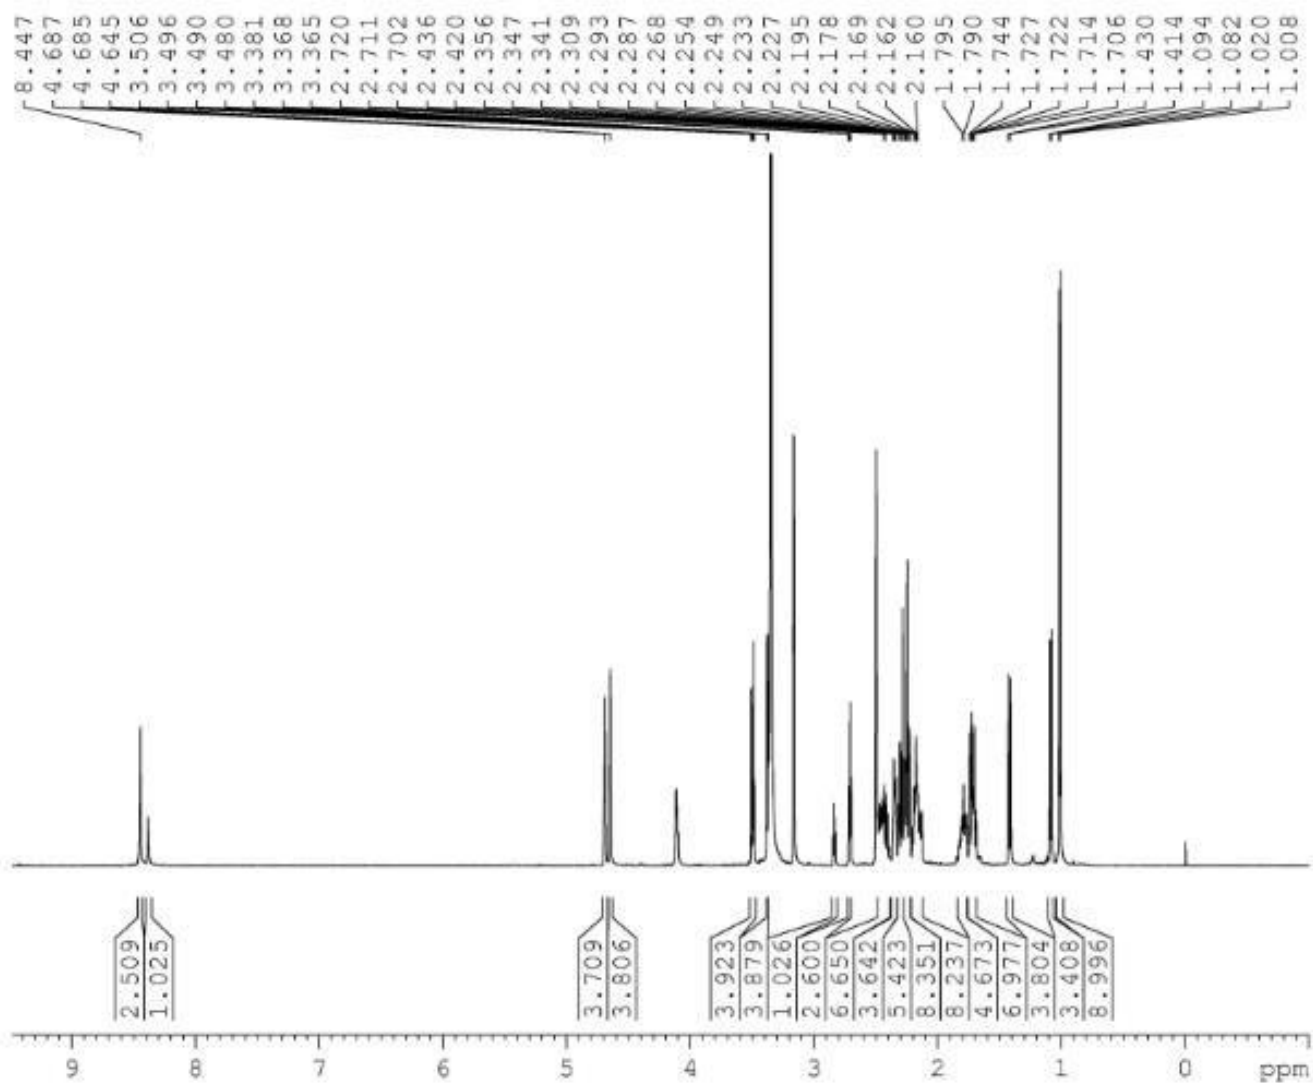

Figure S9.  $^{13}\text{C}$  NMR (100 MHz,  $\text{DMSO-}d_6$ ) spectrum for the mixture of 1 and 2

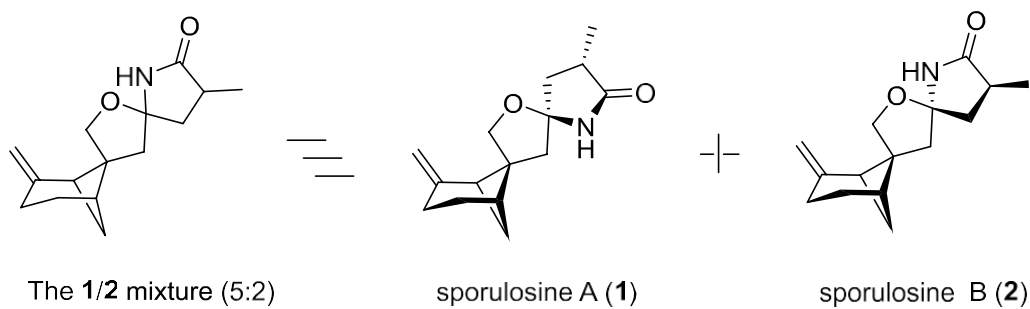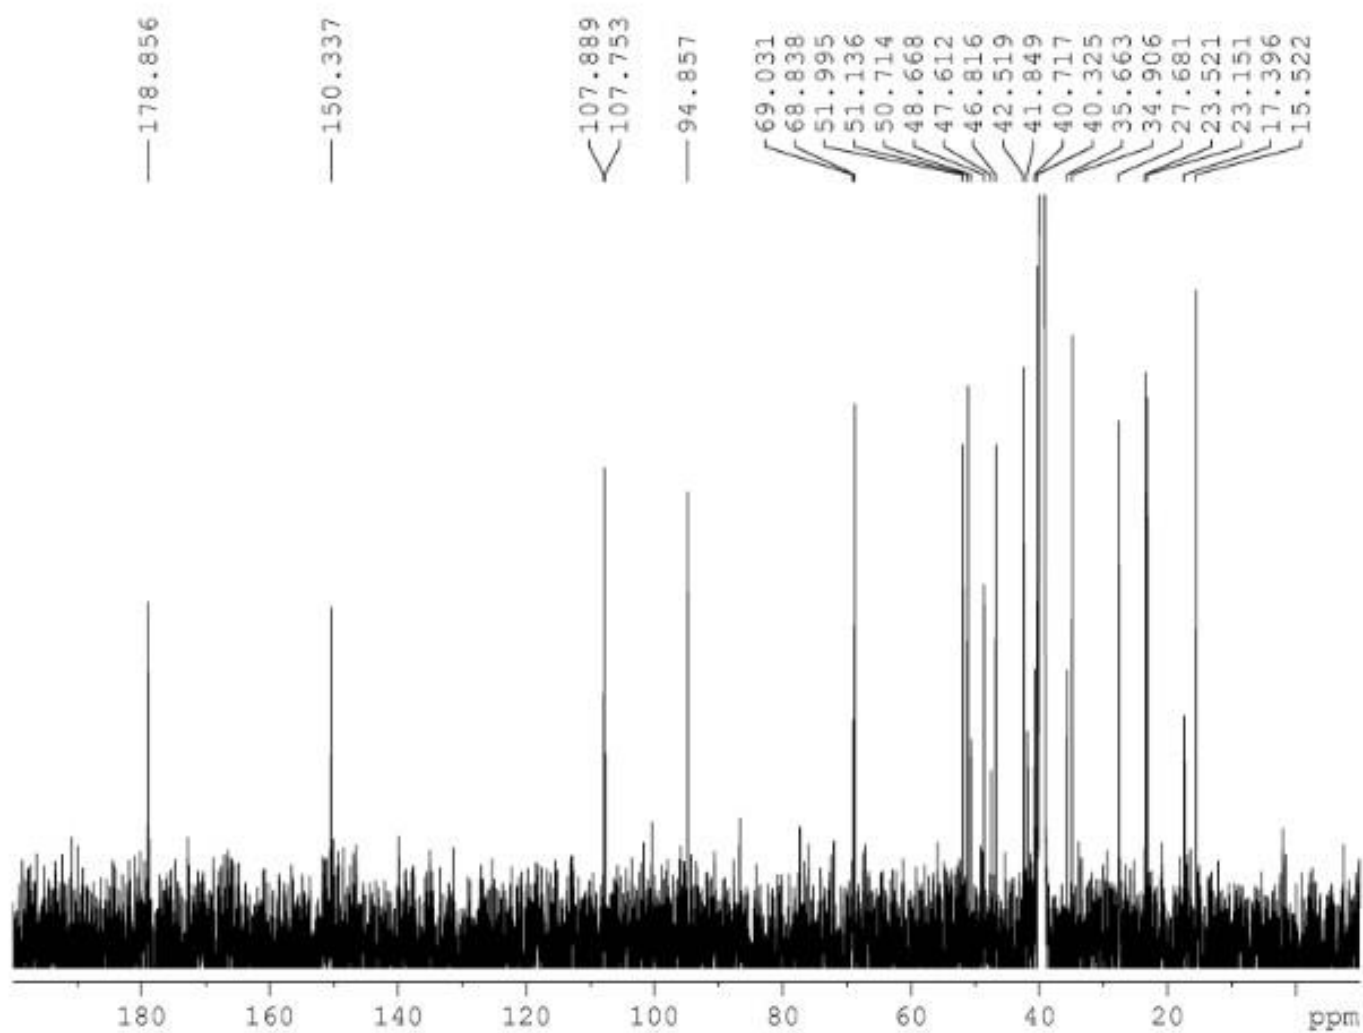

**Figure S10. HSQC (600 MHz, DMSO-*d*<sub>6</sub>) spectrum for the mixture of 1 and 2**

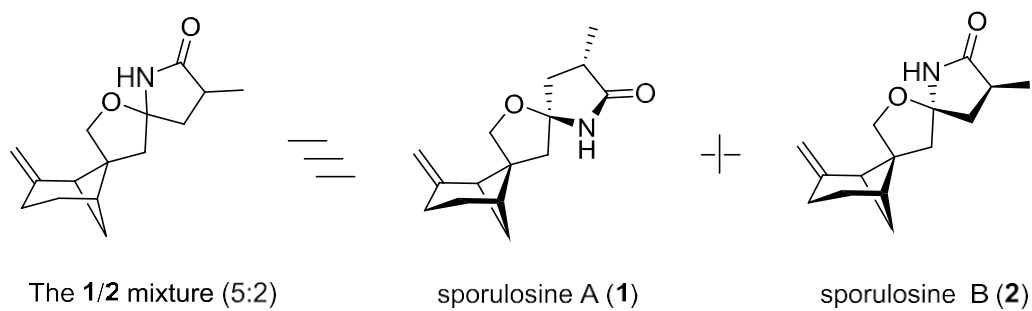

AV-600-HSQC  
Sample:

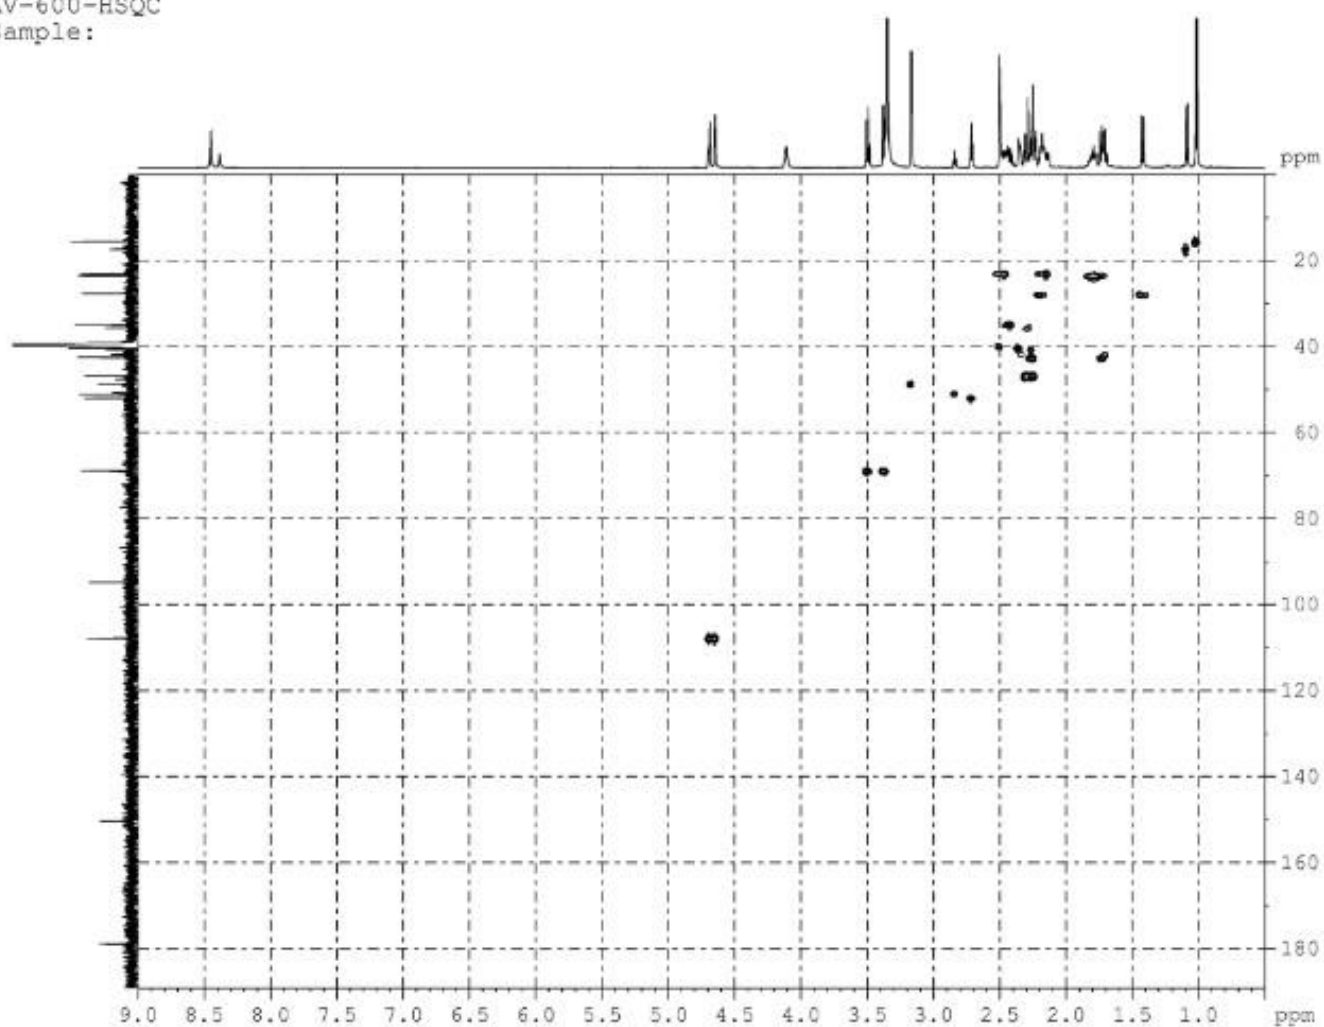



Figure S11. HMBC (600 MHz, DMSO-*d*<sub>6</sub>) spectrum for the mixture of 1 and 2

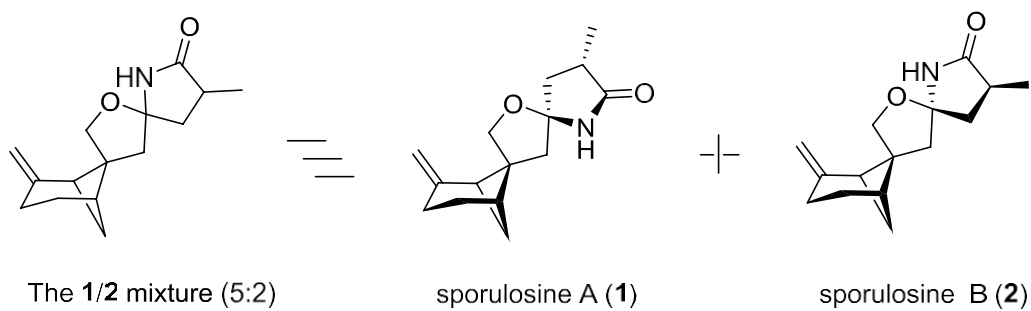

AV-600-HMBC  
Sample:

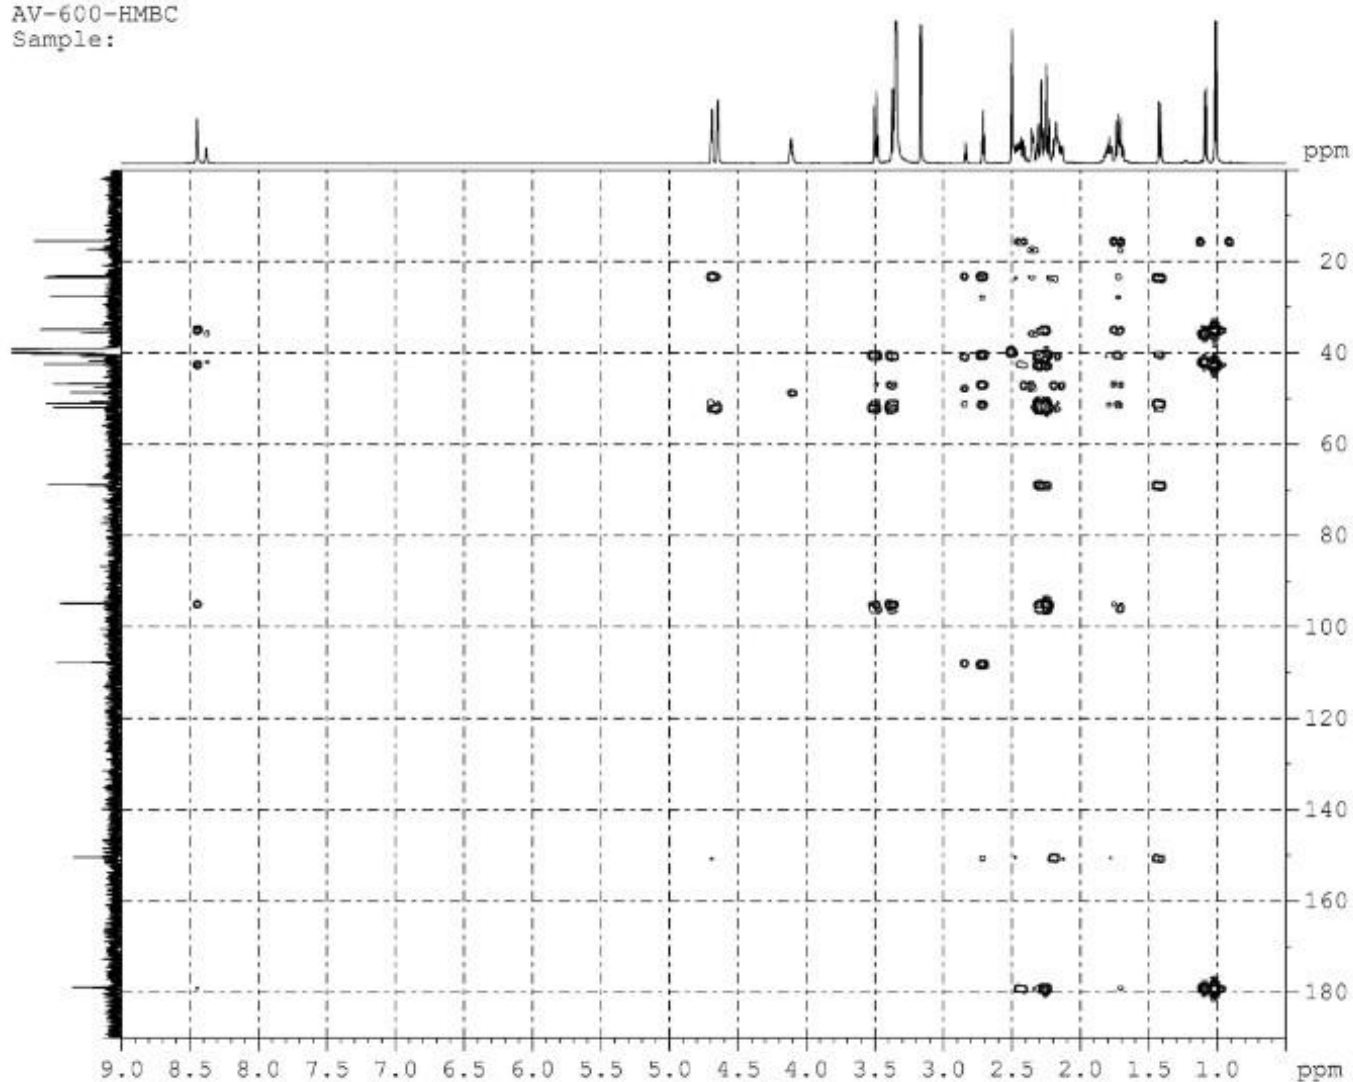

Figure S12. NOESY (600 MHz, DMSO-*d*<sub>6</sub>) spectrum for the mixture of 1 and 2

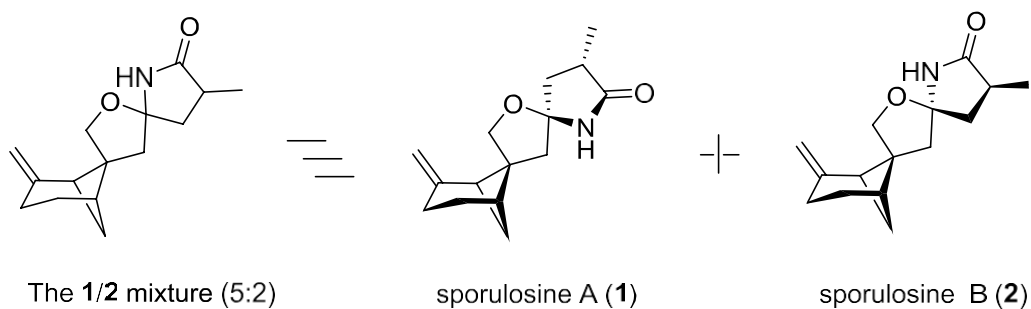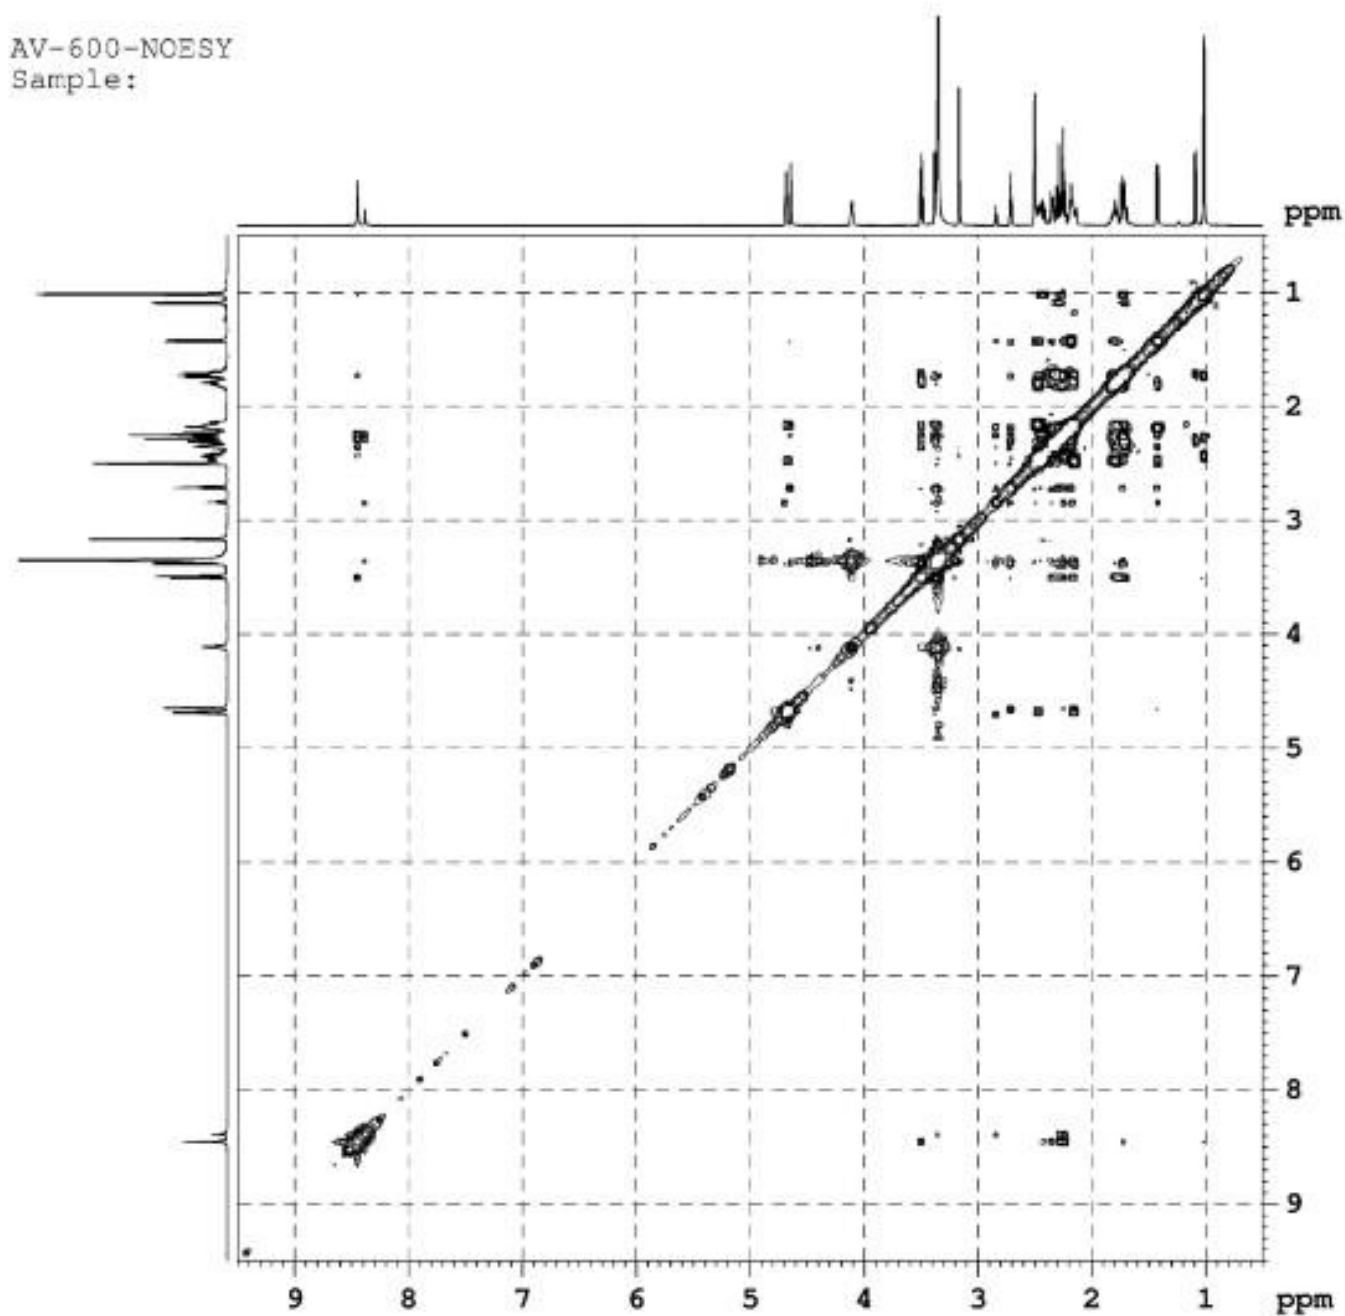

Figure S13. HR ESI-TOF MS spectrum of compound 1 in CH<sub>3</sub>OH

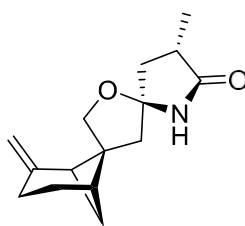

sporulosine A (1)

### Mass Spectrum Molecular Formula Report

#### Analysis Info

Analysis Name D:\Data\20151230CEYANG\ZLH-6-D.d  
 Method tune\_wide\_pos.m  
 Sample Name ZLH-6-D  
 Comment

Acquisition Date 12/30/2015 2:18:59 PM  
 Operator Bruker Customer  
 Instrument / Ser# micrOTOF-Q 125

#### Acquisition Parameter

|             |          |                       |           |                  |           |
|-------------|----------|-----------------------|-----------|------------------|-----------|
| Source Type | ESI      | Ion Polarity          | Positive  | Set Nebulizer    | 0.3 Bar   |
| Focus       | Active   | Set Capillary         | 4500 V    | Set Dry Heater   | 180 °C    |
| Scan Begin  | 50 m/z   | Set End Plate Offset  | -500 V    | Set Dry Gas      | 4.0 l/min |
| Scan End    | 3000 m/z | Set Collision Cell RF | 400.0 Vpp | Set Divert Valve | Source    |

#### Generate Molecular Formula Parameter

|                  |              |                        |       |         |   |
|------------------|--------------|------------------------|-------|---------|---|
| Formula, min.    | C15H21N1O2Na |                        |       |         |   |
| Formula, max.    |              |                        |       |         |   |
| Measured m/z     | 270.147      | Tolerance              | 5 ppm | Charge  | 1 |
| Check Valence    | no           | Minimum                | 0     | Maximum | 0 |
| Nitrogen Rule    | yes          | Electron Configuration | both  | Maximum | 3 |
| Filter H/C Ratio | yes          | Minimum                | 0     |         |   |
| Estimate Carbon  | yes          |                        |       |         |   |

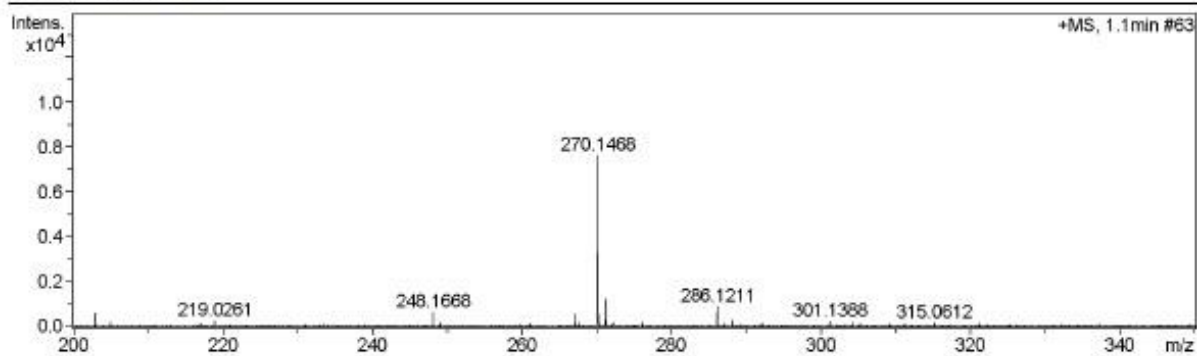

| Sum Formula            | Sigma | m/z      | Err [ppm] | Mean Err [ppm] | Err [mDa] | rdb  | N Rule | e <sup>-</sup> |
|------------------------|-------|----------|-----------|----------------|-----------|------|--------|----------------|
| C 15 H 21 N 1 Na 1 O 2 | 0.007 | 270.1465 | -1.42     | -1.09          | -0.38     | 5.50 | ok     | even           |

**Figure S14.  $^1\text{H}$  NMR (600 MHz,  $\text{DMSO-}d_6$ ) spectrum of compound 1**

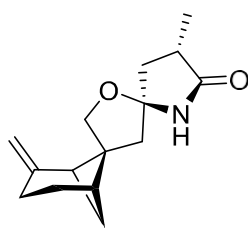

sporulosine A (1)

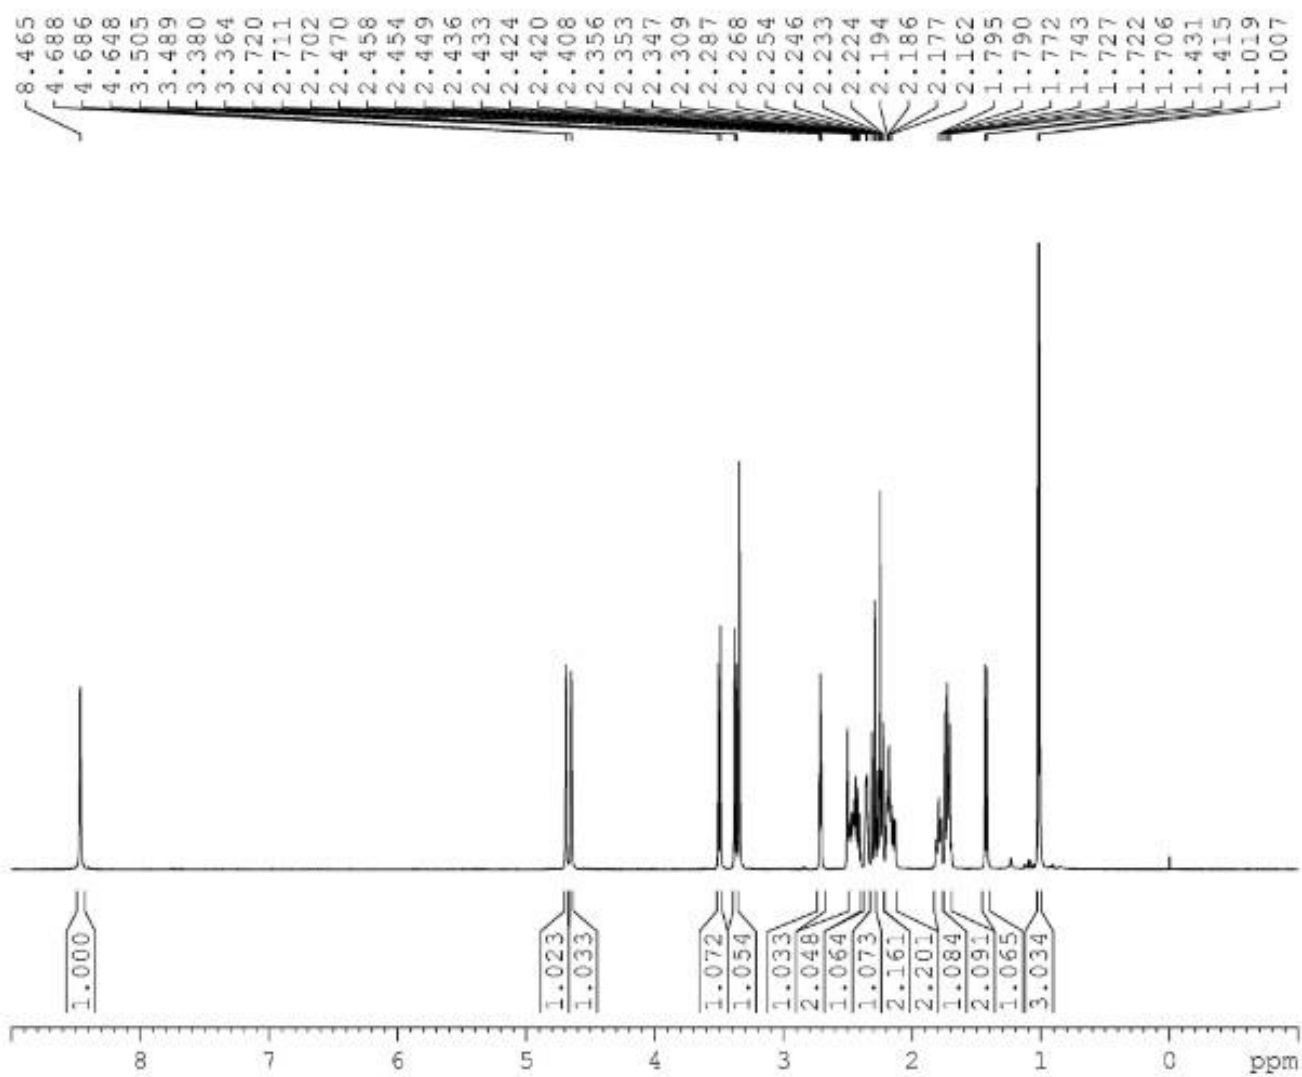

Figure S15.  $^{13}\text{C}$  NMR (150 MHz,  $\text{DMSO-}d_6$ ) spectrum of compound 1

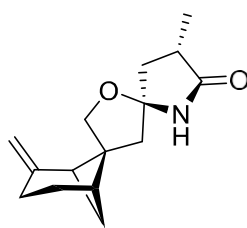

sporulosine A (1)

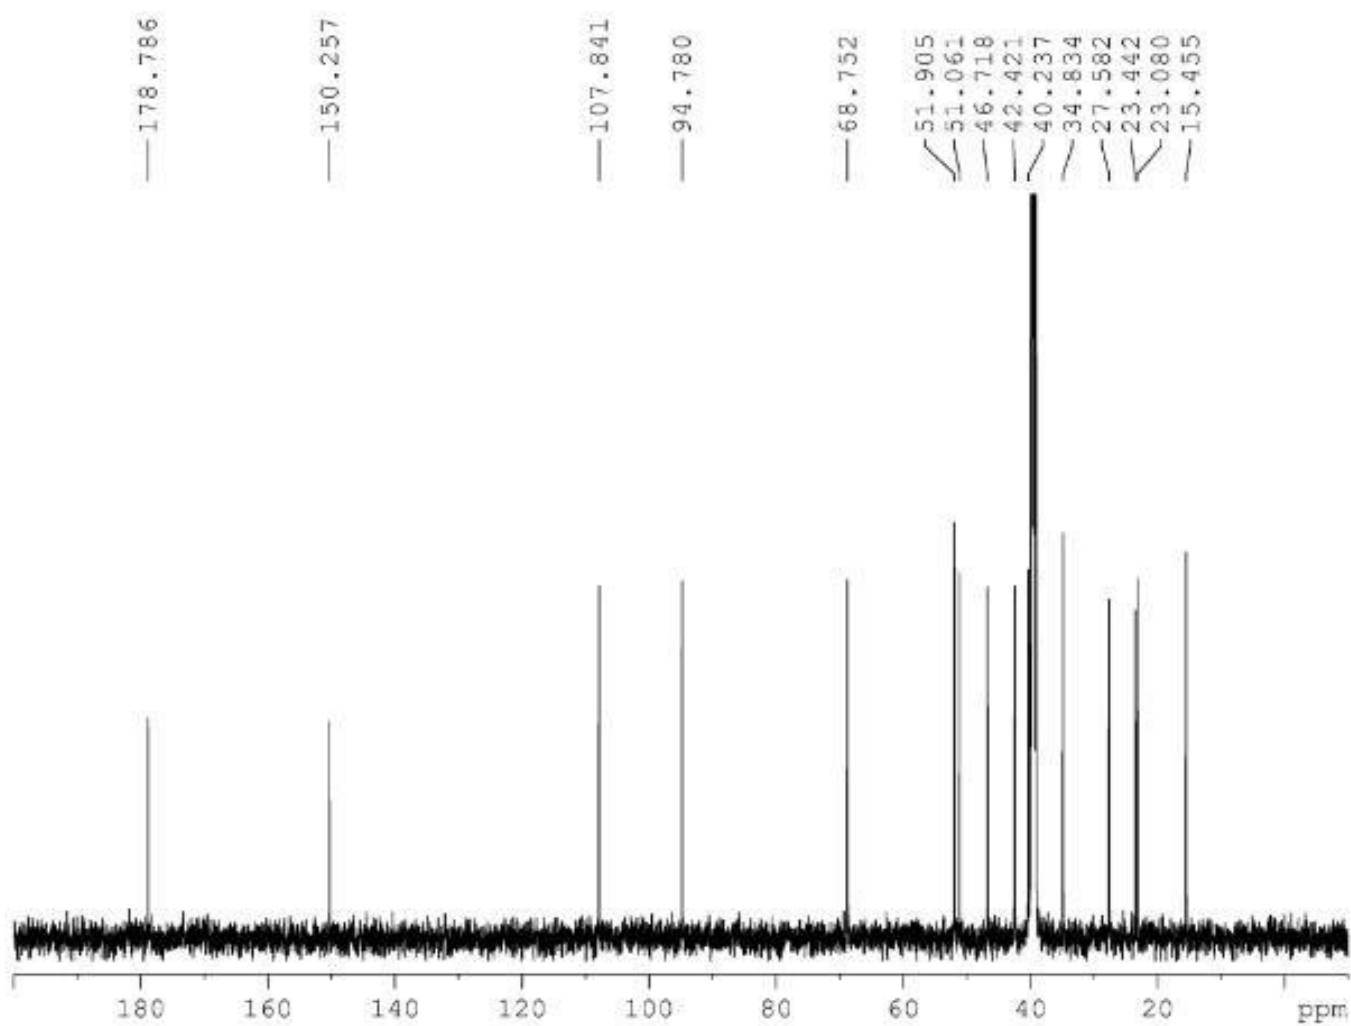

Figure S16. The HSQC correlations of compound 1 in HSQC (600 MHz, DMSO-*d*<sub>6</sub>) spectrum of the 1/2 mixture

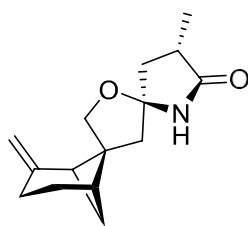

sporulosine A (1)

AV-600-HSQC  
Sample:

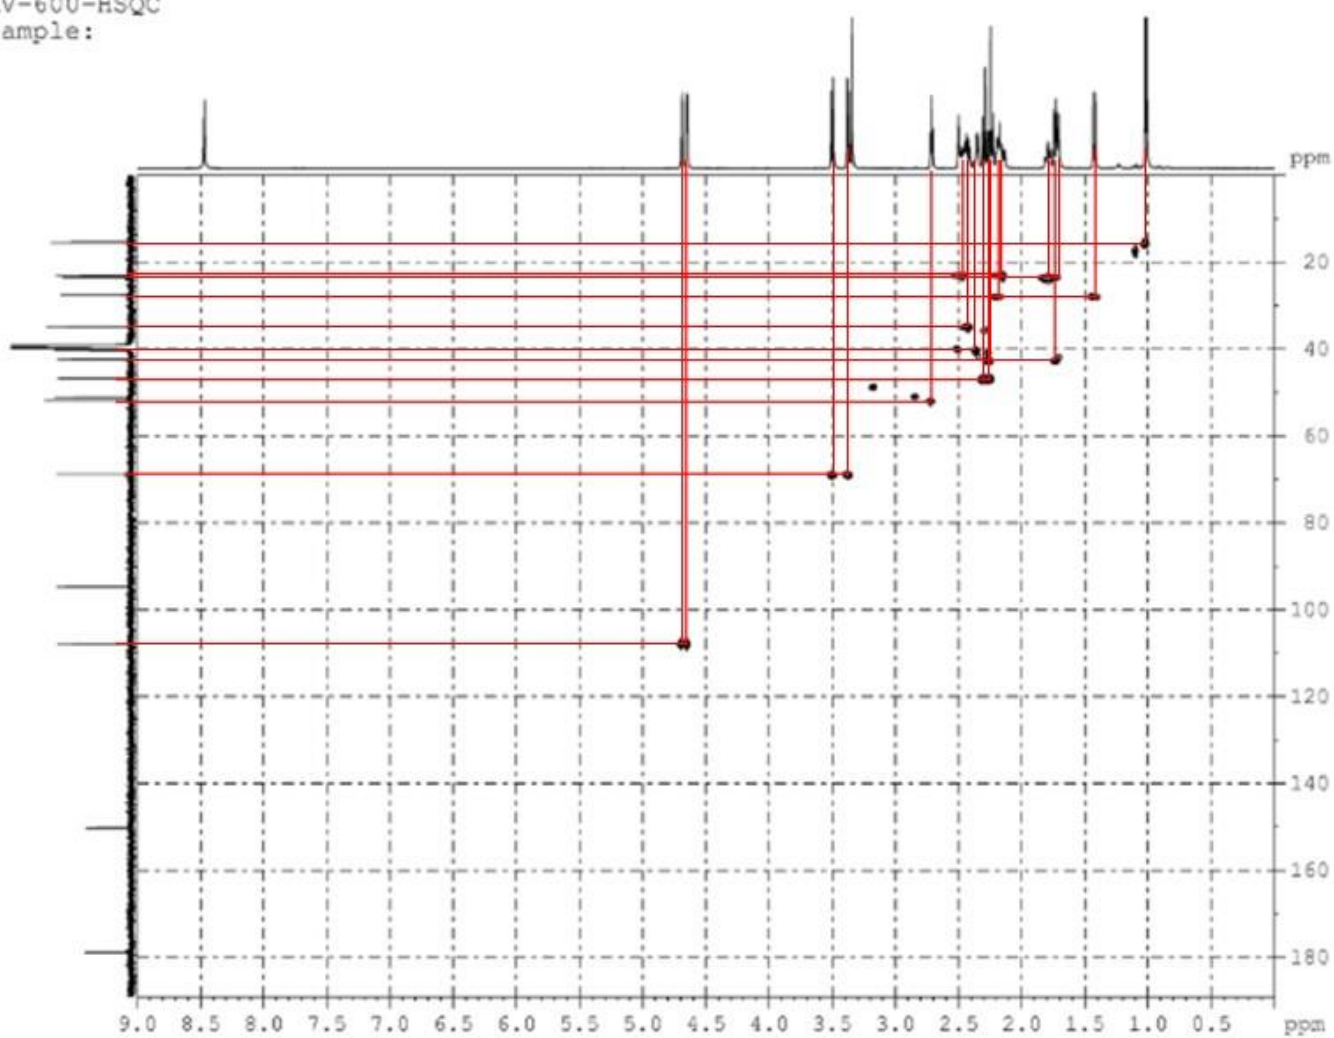

**Figure S17. The HMBC correlations of compound 1 in HMBC (600 MHz, DMSO-*d*<sub>6</sub>) spectrum of the 1/2 mixture**

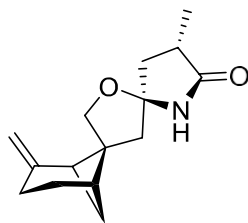

sporulosine A (1)

AV-600-HMBC  
Sample:

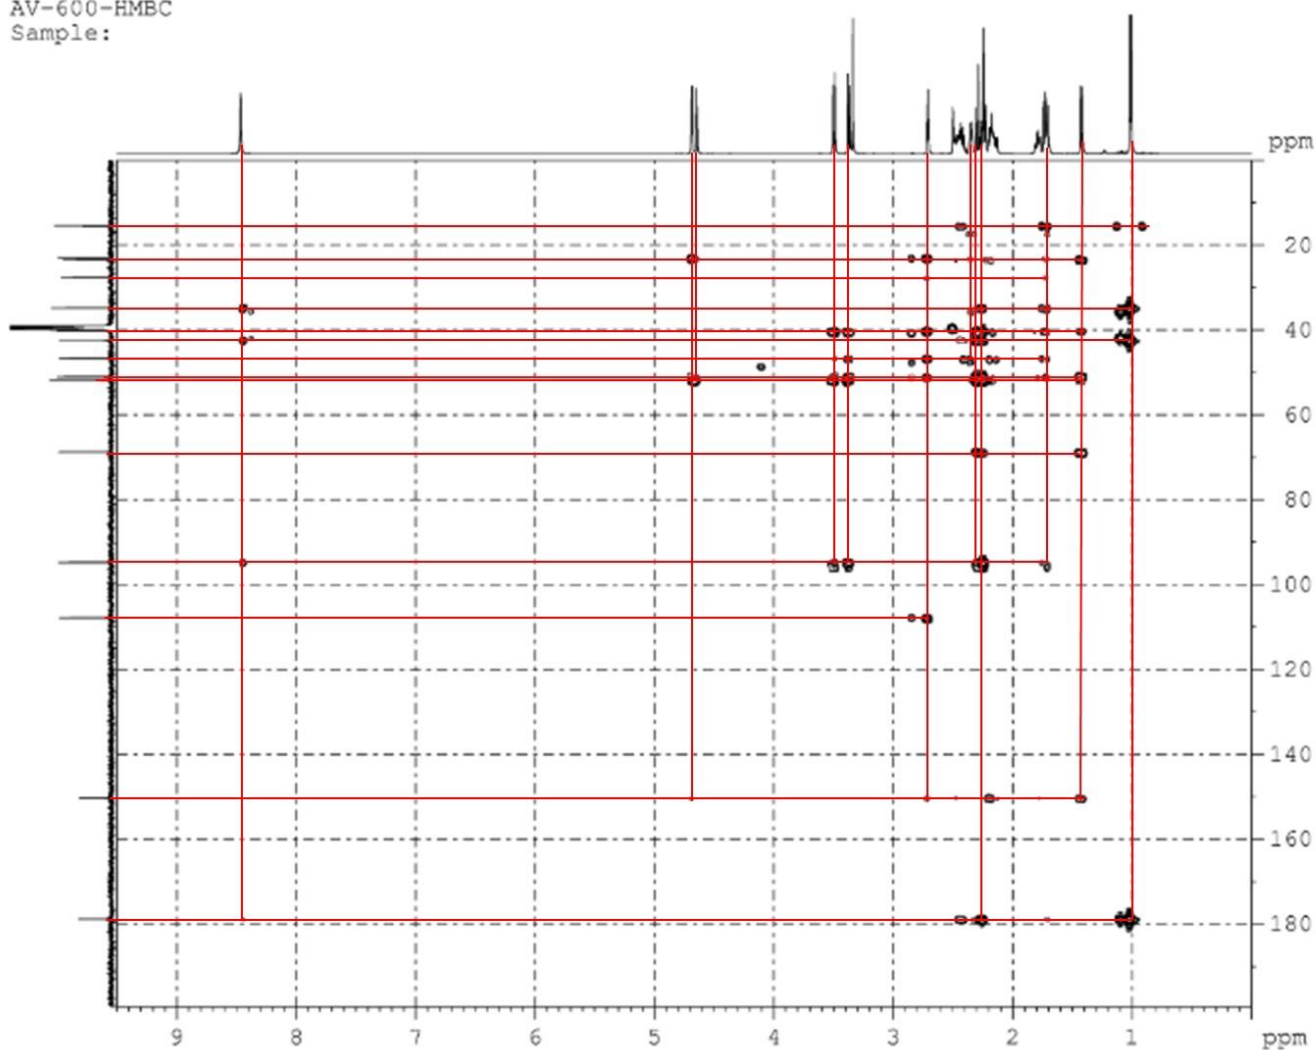

Figure S18. NOESY (600 MHz, DMSO-*d*<sub>6</sub>) spectrum of compound 1

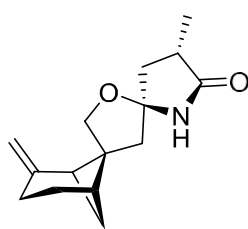

sporulosine A (1)

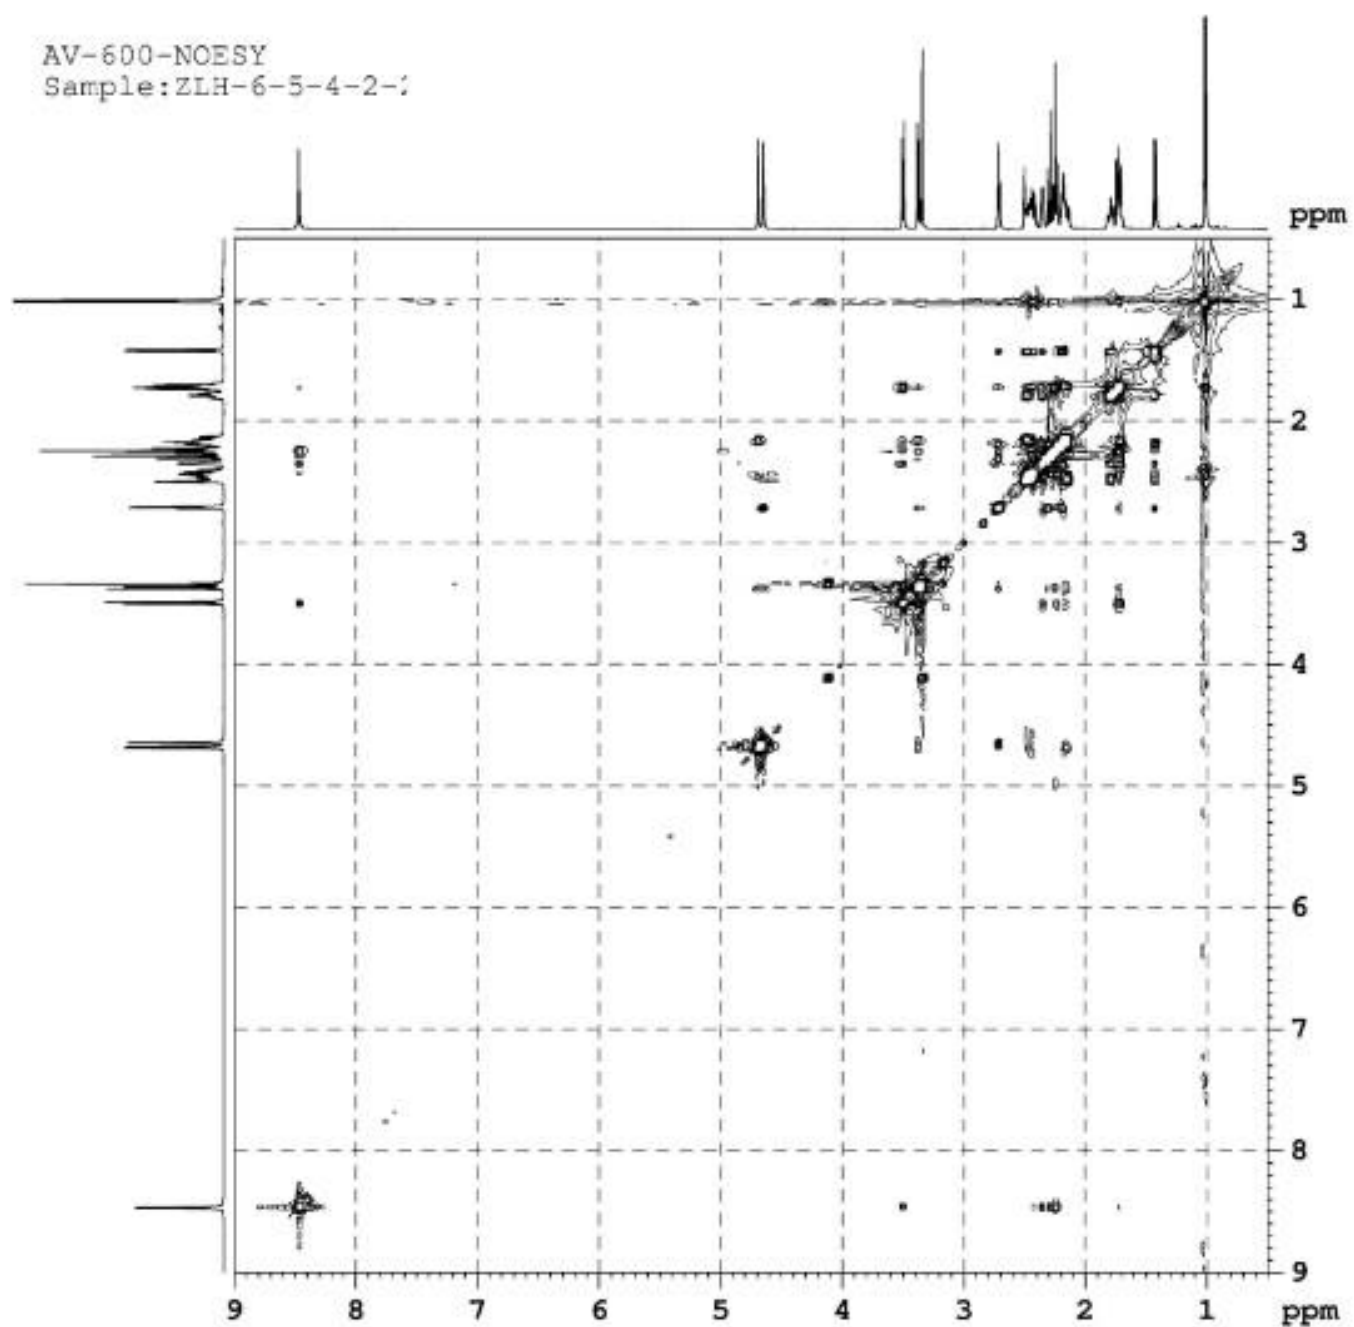



Figure S19. IR spectrum of compound 1

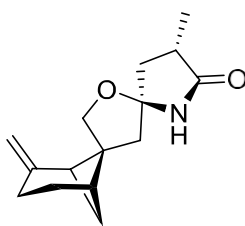

sporulosine A (1)

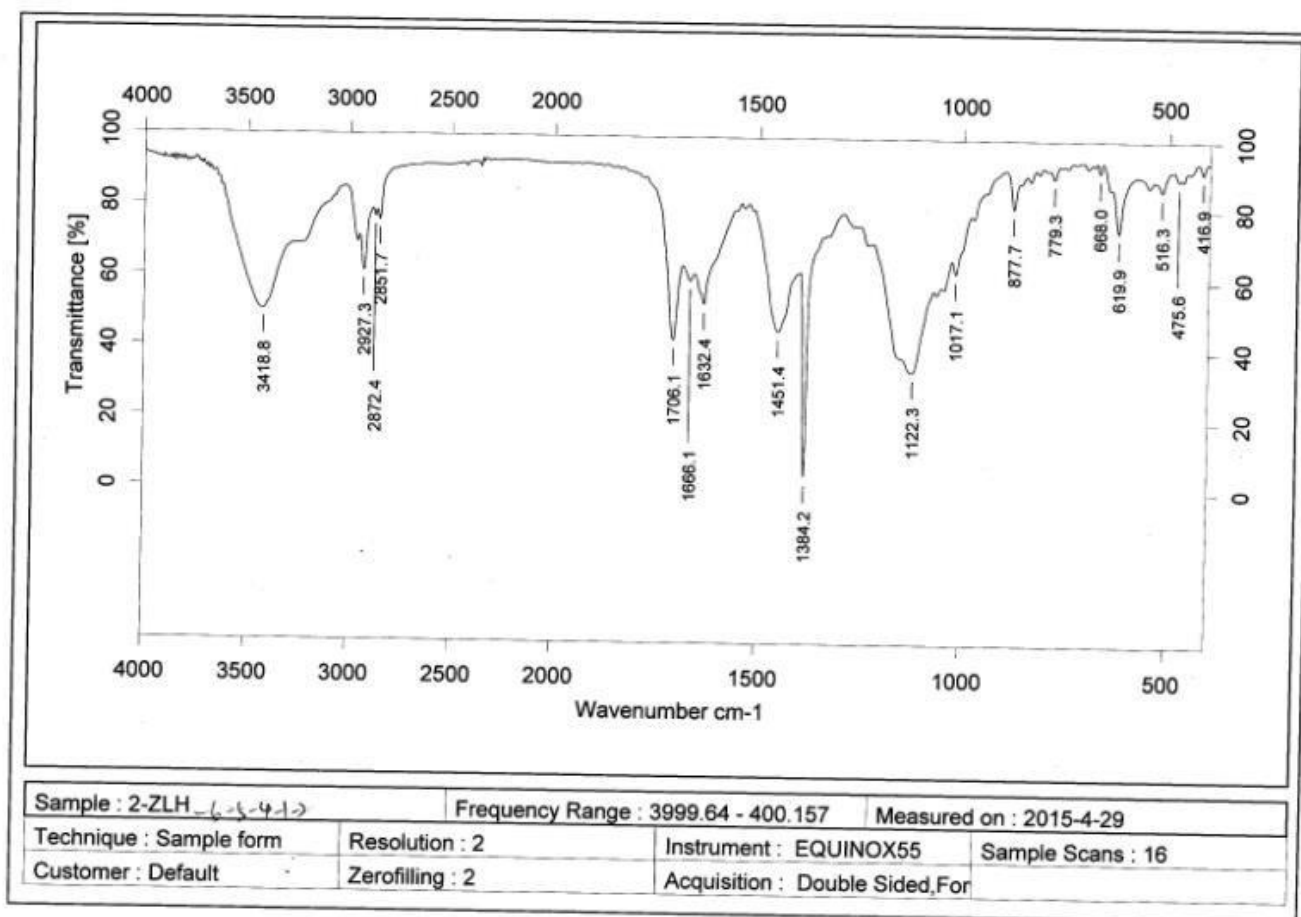

Figure S20. UV spectrum of compound 1

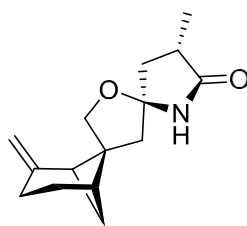

sporulosine A (1)

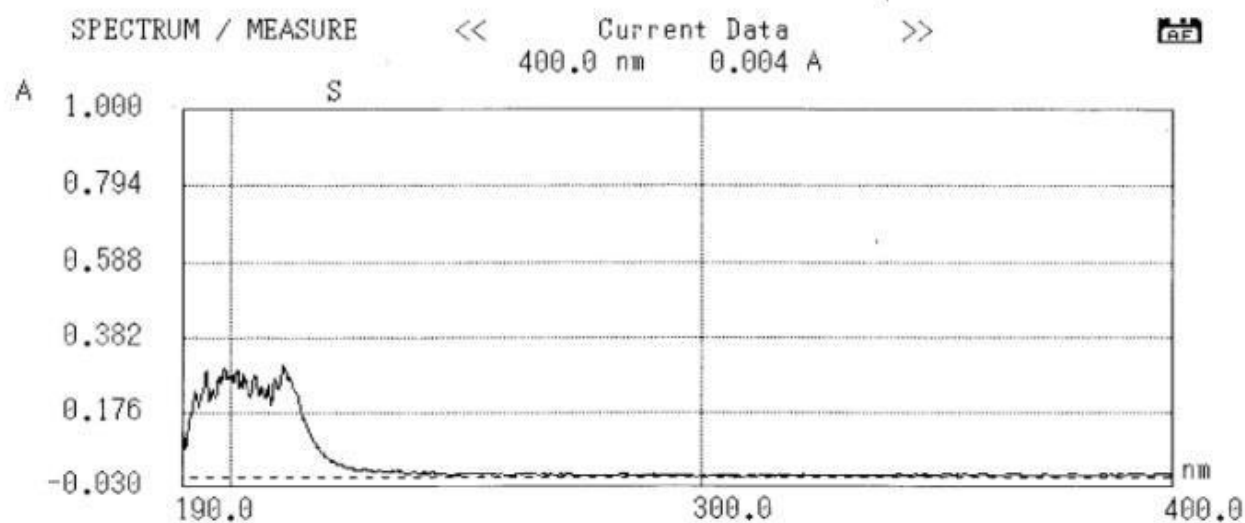

> Set sample then press [Start Scan].

⊞Enlarge/Reduce File (SP) Rec. Output Set Parameters Start Scan

| NO. | ABSCISSA | PEAK   | HEIGHT | ABSCISSA | VALLEY | HEIGHT  |
|-----|----------|--------|--------|----------|--------|---------|
| 1   | 211.0    | 0.3096 | 0.0816 | 208.6    | 0.1987 | -0.0726 |
| 2   | 205.2    | 0.2783 | 0.0807 |          |        |         |
| 3   | 192.4    | 0.2341 | 0.0690 |          |        |         |

**Figure S21. CD spectrum of compound 1**

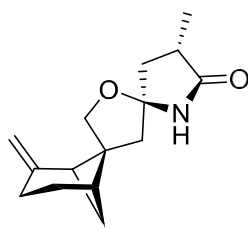

sporulosine A (**1**)

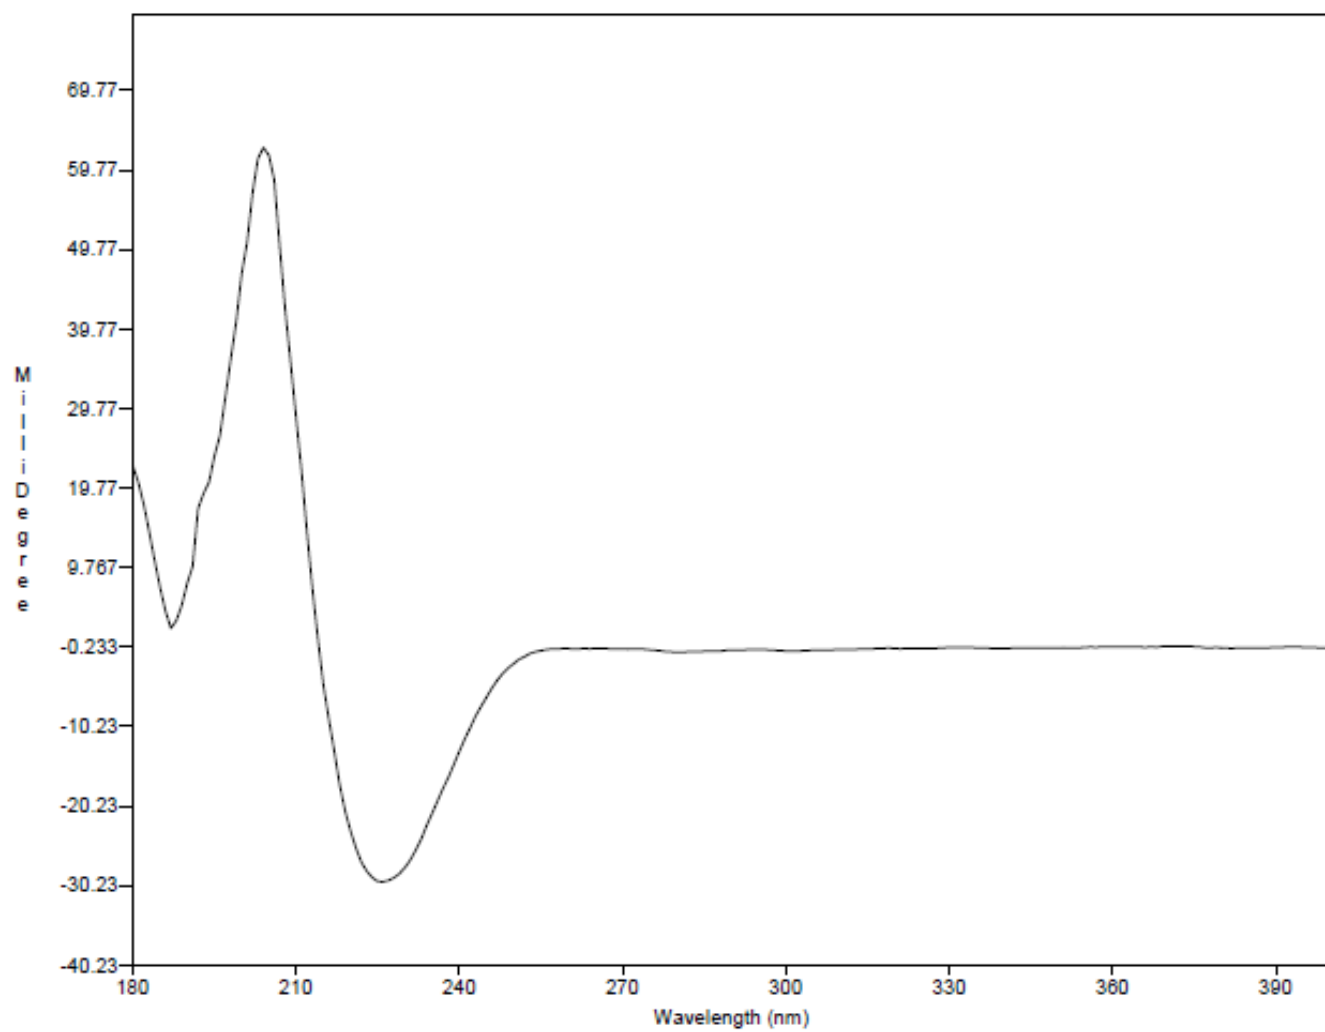

Figure S22. HR ESI-TOF MS spectrum of compound 2 in CH<sub>3</sub>OH

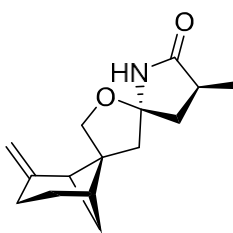

sporulosine B (2)

### Mass Spectrum Molecular Formula Report

#### Analysis Info

Analysis Name D:\Data\20151230CEYANG\ZLH-6-X.d  
 Method tune\_wide\_pos.m  
 Sample Name ZLH-6-X  
 Comment

Acquisition Date 12/30/2015 2:16:51 PM  
 Operator Bruker Customer  
 Instrument / Ser# micrOTOF-Q 125

#### Acquisition Parameter

|             |          |                       |           |                  |           |
|-------------|----------|-----------------------|-----------|------------------|-----------|
| Source Type | ESI      | Ion Polarity          | Positive  | Set Nebulizer    | 0.3 Bar   |
| Focus       | Active   | Set Capillary         | 4500 V    | Set Dry Heater   | 180 °C    |
| Scan Begin  | 50 m/z   | Set End Plate Offset  | -500 V    | Set Dry Gas      | 4.0 l/min |
| Scan End    | 3000 m/z | Set Collision Cell RF | 400.0 Vpp | Set Divert Valve | Source    |

#### Generate Molecular Formula Parameter

|                  |                                                                              |                        |       |
|------------------|------------------------------------------------------------------------------|------------------------|-------|
| Formula, min.    | C <sub>8</sub> H <sub>21</sub> N <sub>1</sub> Na <sub>1</sub> O <sub>2</sub> |                        |       |
| Formula, max.    |                                                                              |                        |       |
| Measured m/z     | 270.146                                                                      | Tolerance              | 5 ppm |
| Charge           |                                                                              | Charge                 | 1     |
| Check Valence    | no                                                                           | Minimum                | 0     |
| Nitrogen Rule    | yes                                                                          | Electron Configuration | both  |
| Filter H/C Ratio | yes                                                                          | Minimum                | 0     |
| Estimate Carbon  | yes                                                                          | Maximum                | 3     |

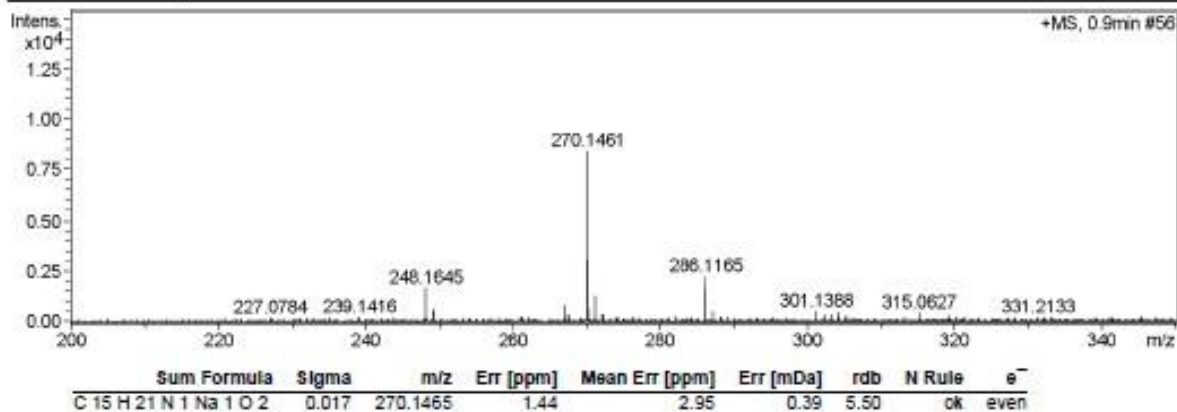

**Figure S23.  $^1\text{H}$  NMR (600 MHz,  $\text{DMSO-}d_6$ ) spectrum of compound 2**

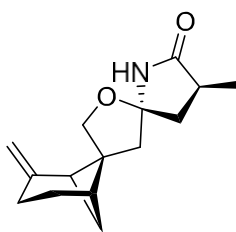

sporulosine B (2)

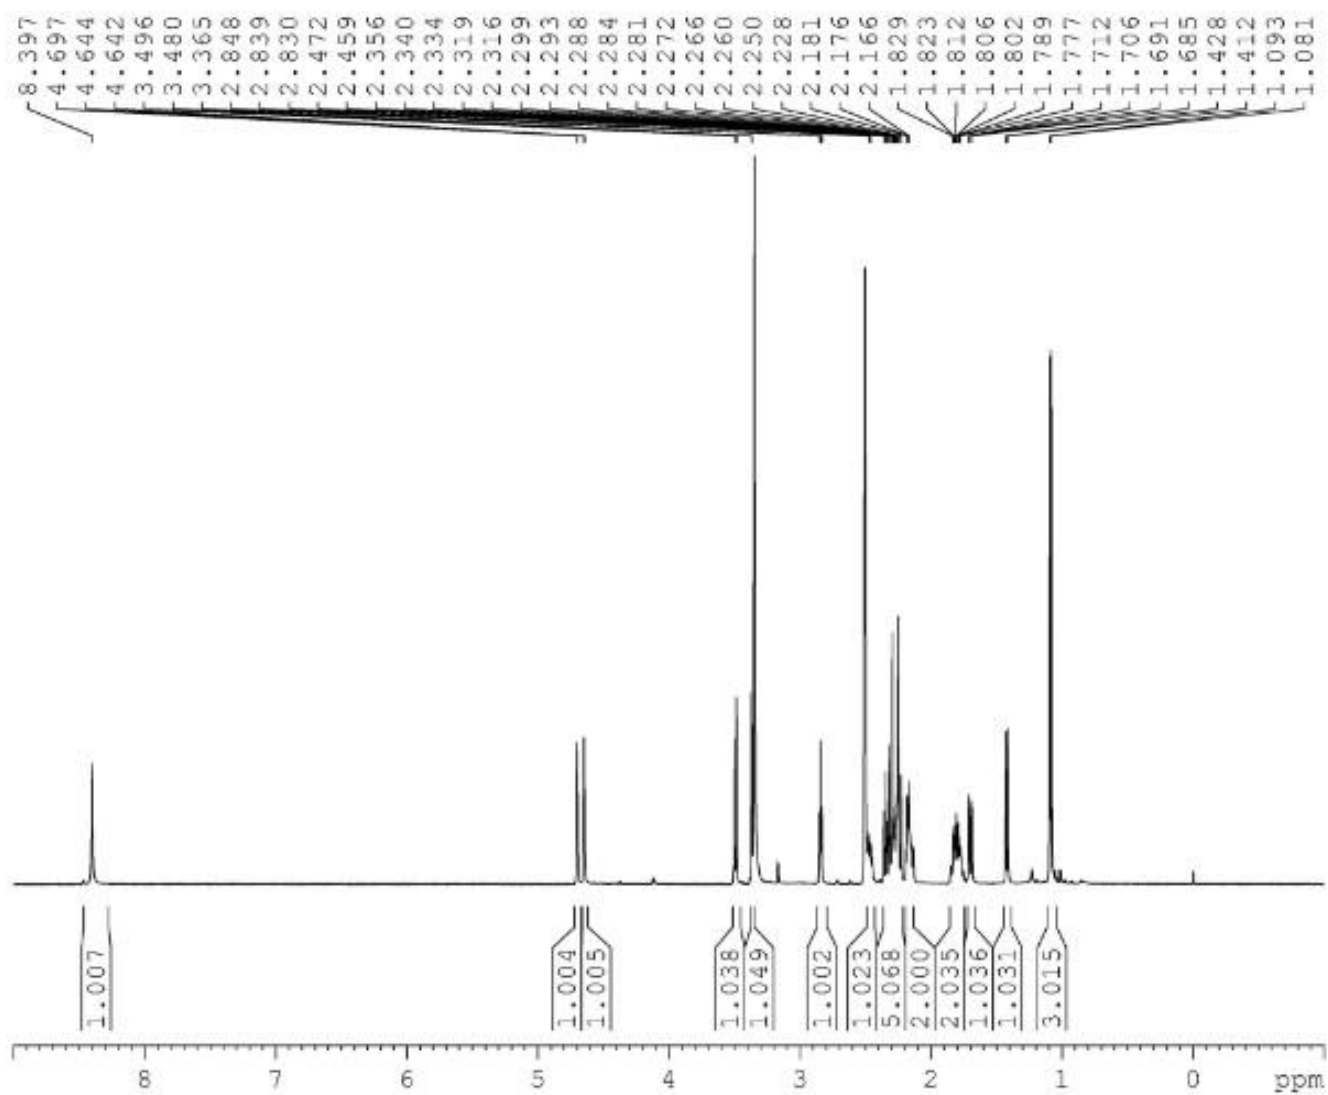

Figure S24.  $^{13}\text{C}$  NMR (150 MHz,  $\text{DMSO-}d_6$ ) spectrum of compound 2



sporulosine B (2)

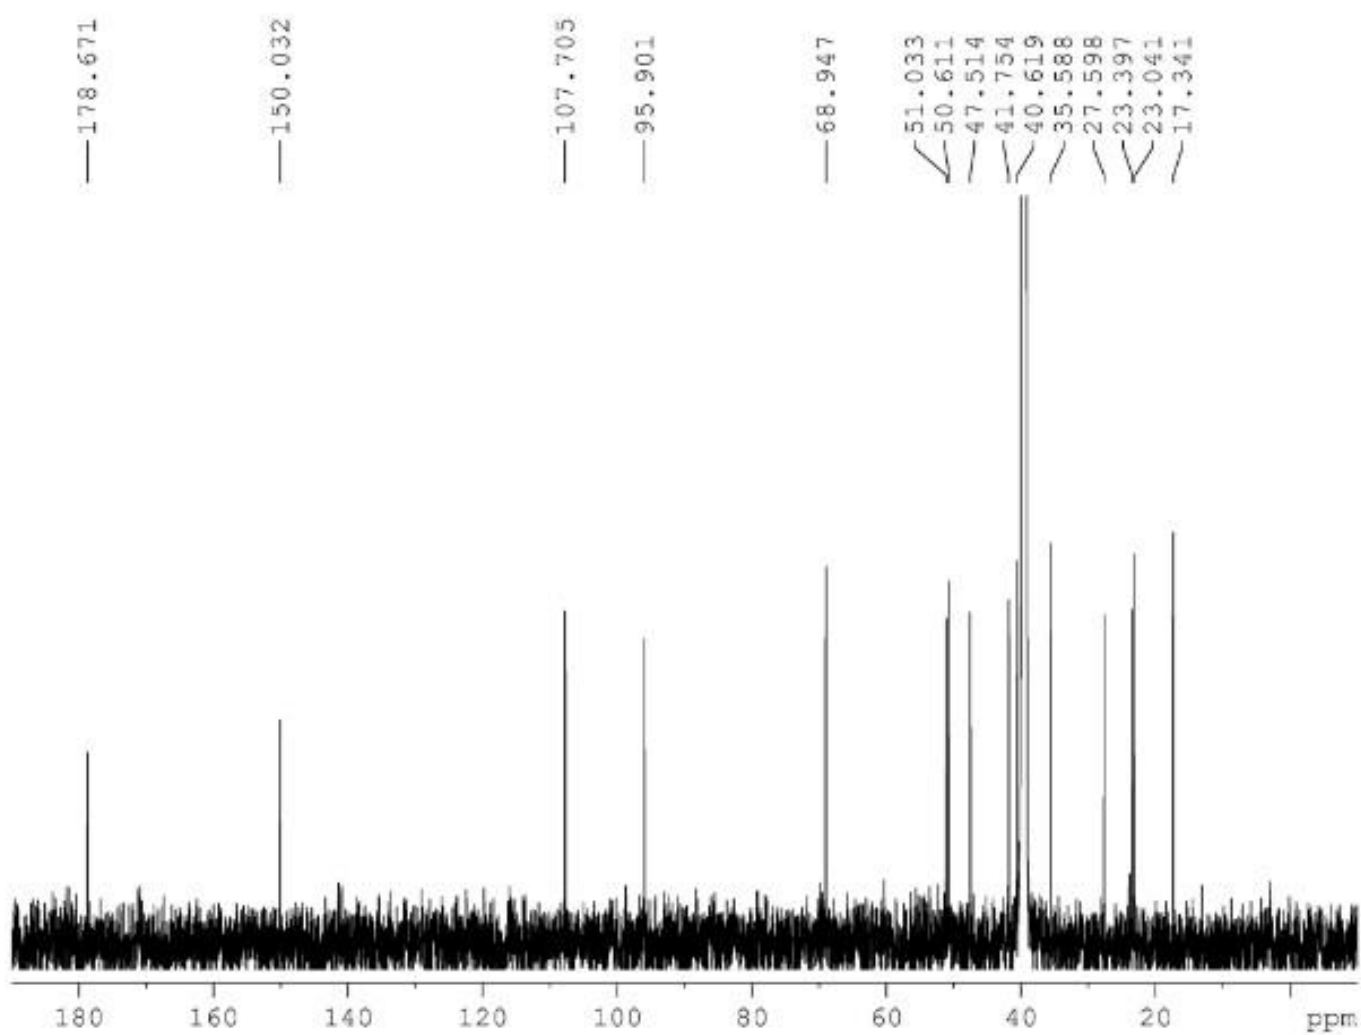

Figure S25. The HSQC correlations of compound 2 in HSQC (600 MHz, DMSO-*d*<sub>6</sub>) spectrum of the 1/2 mixture

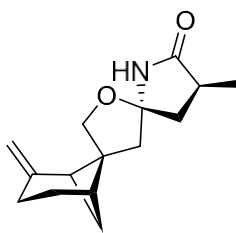

sporulosine B (2)

AV-600-HSQC  
Sample:

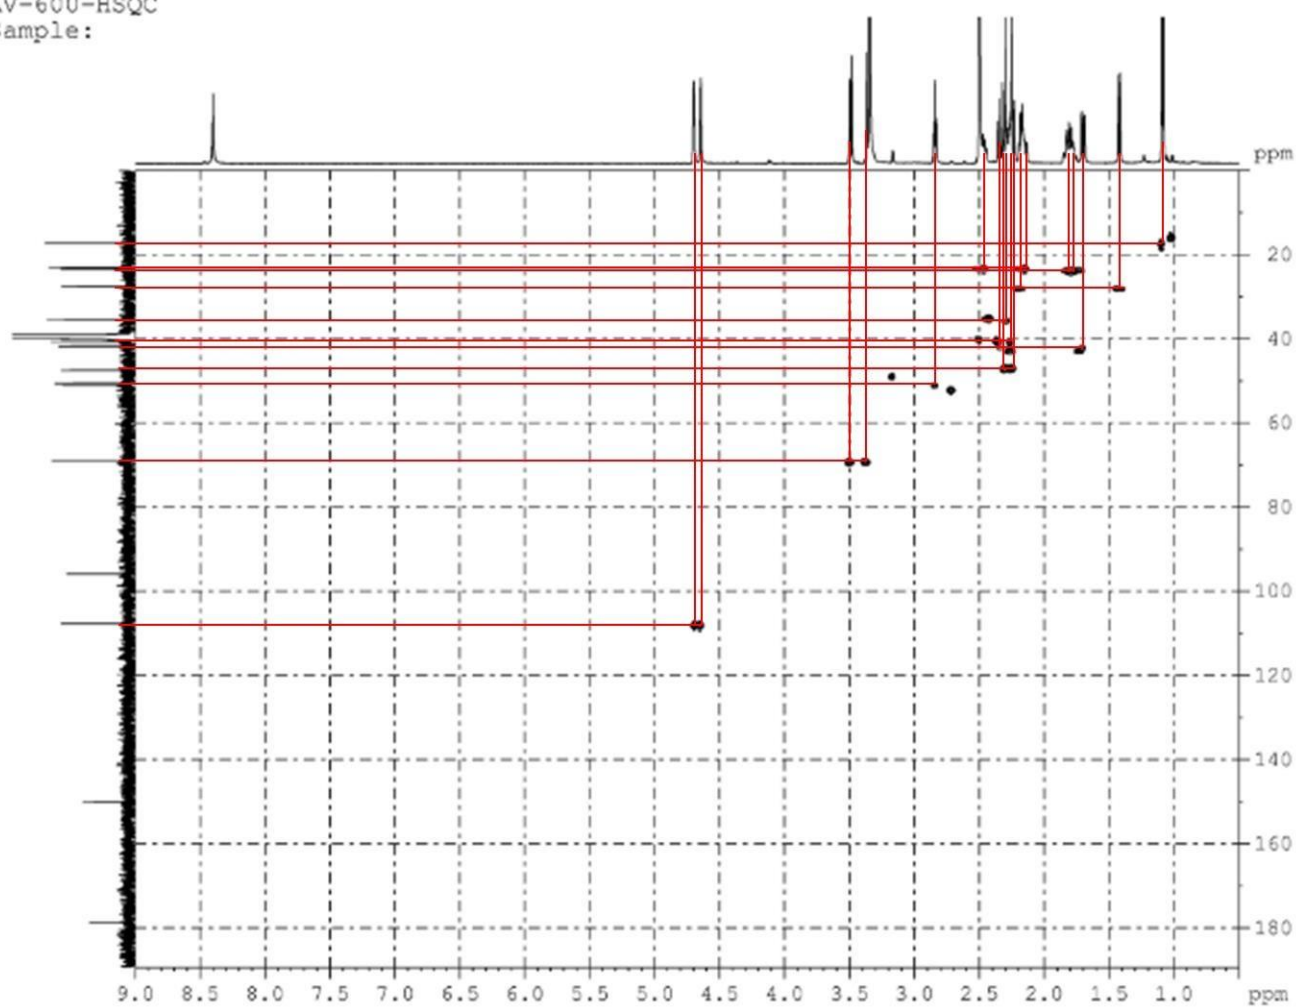

Figure S26. The HMBC correlations of compound 2 in HMBC (600 MHz, DMSO- $d_6$ ) spectrum of the 1/2 mixture



sporulosine B (2)

AV-600-HMBC  
Sample:

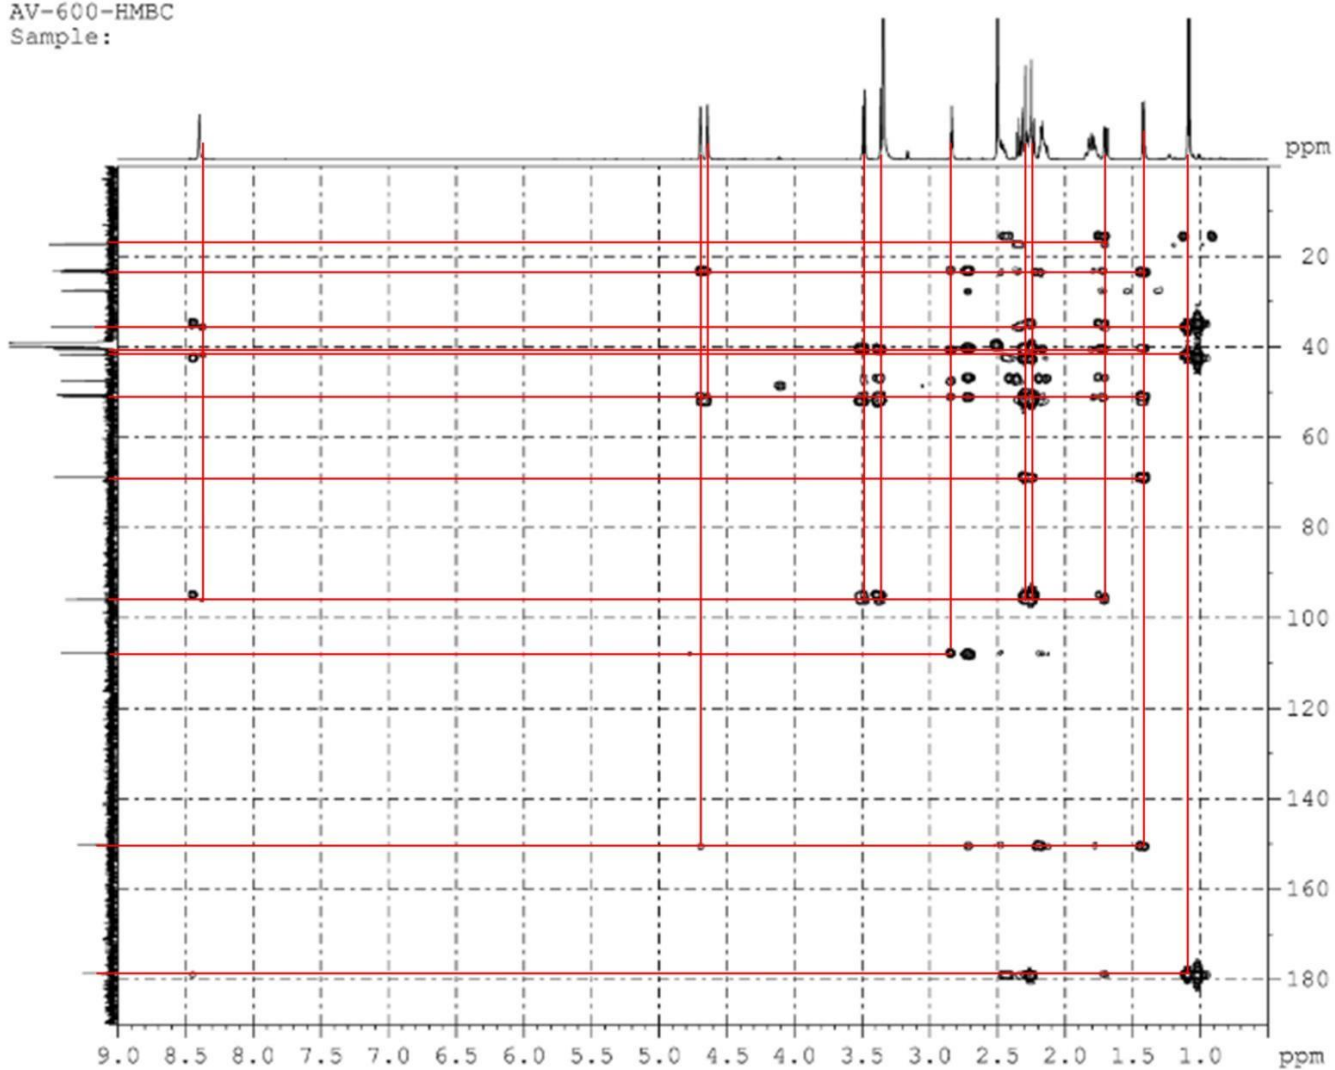



Figure S27. NOESY spectrum (600 MHz, DMSO-*d*<sub>6</sub>) of compound 2

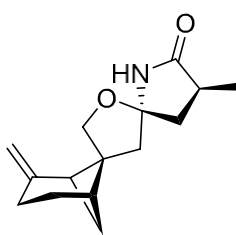

sporulosine B (2)

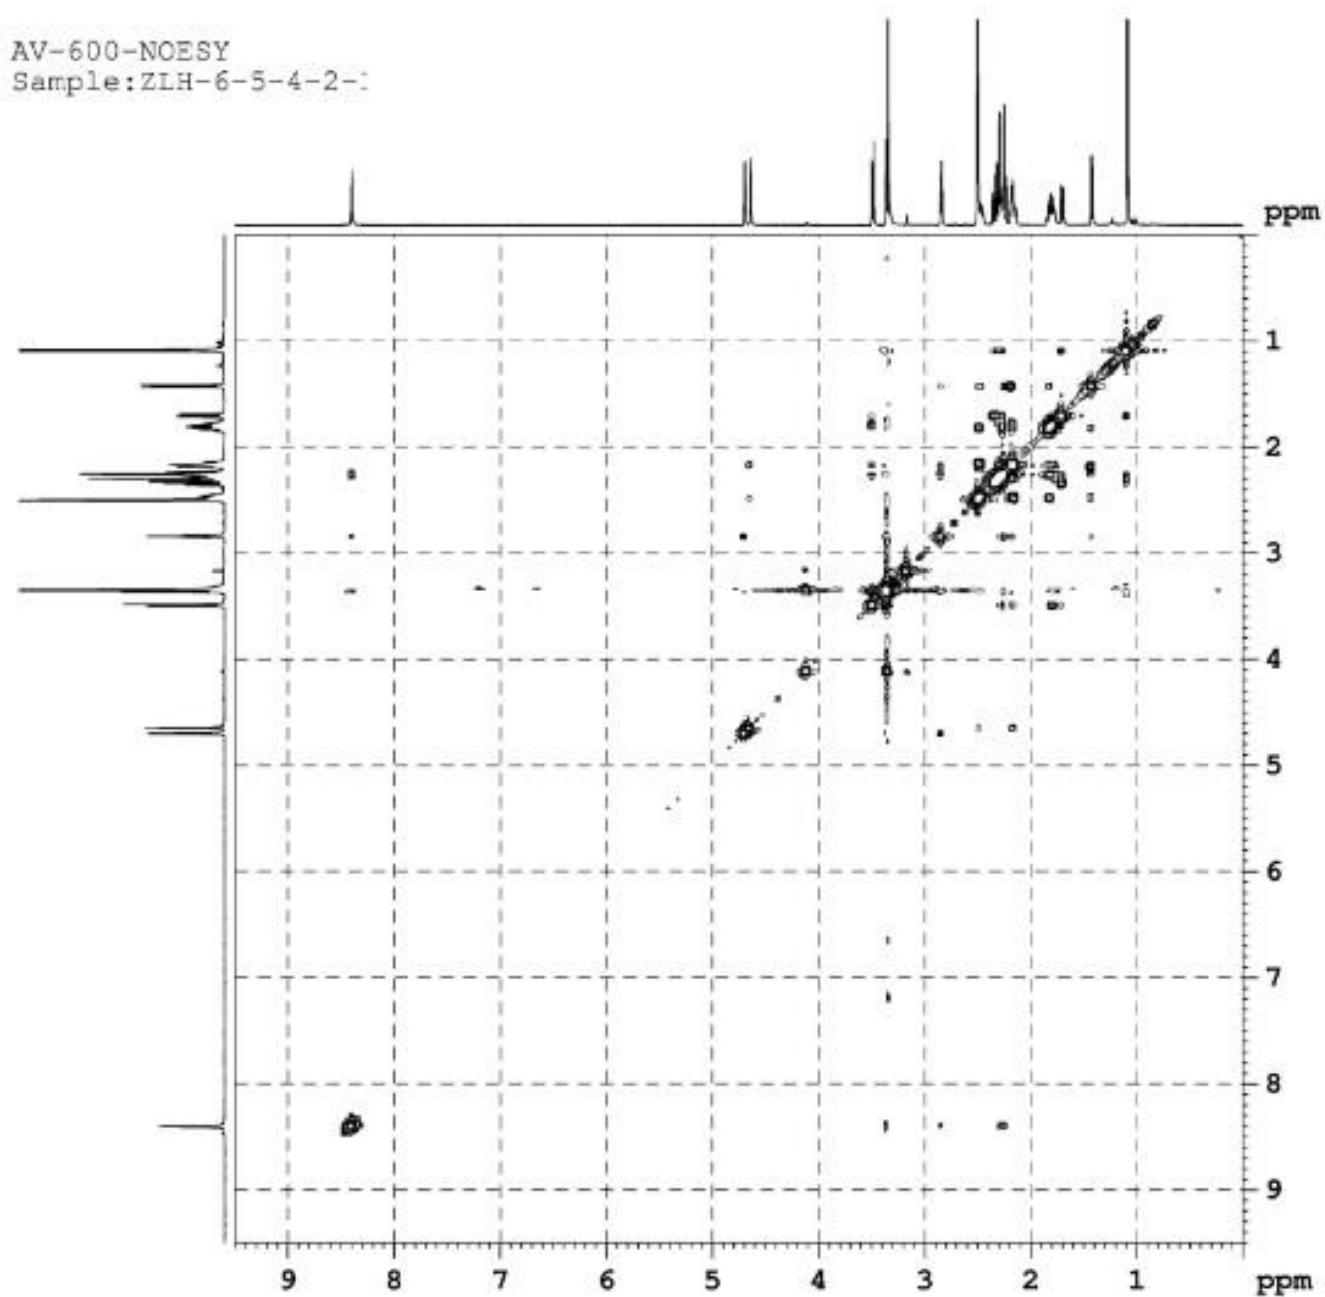

Figure S28. IR spectrum of compound 2

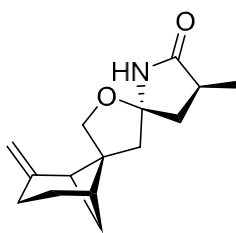

sporulosine B (2)

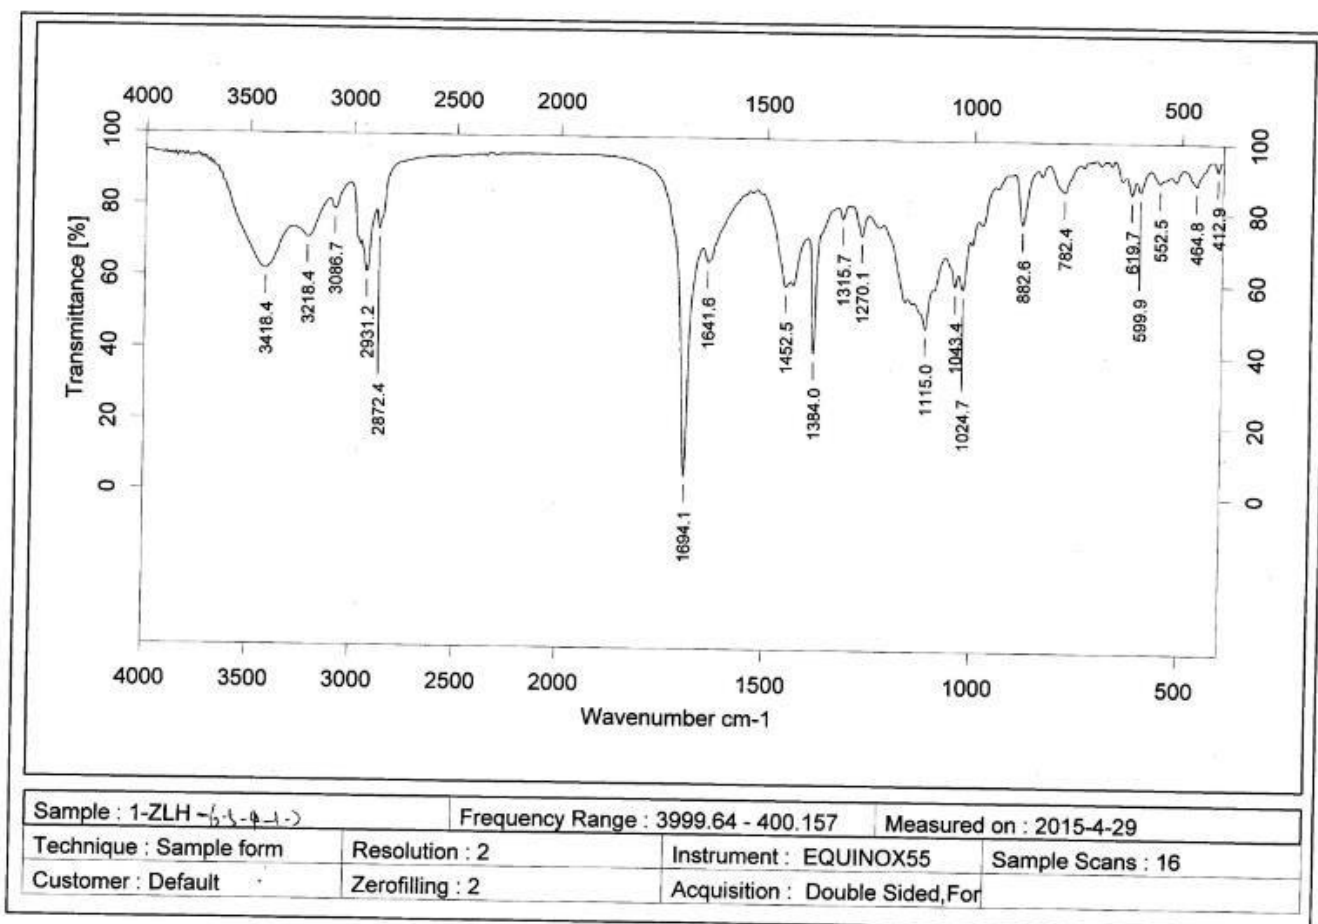

Figure S29. UV spectrum of compound 2



sporulosine B (2)

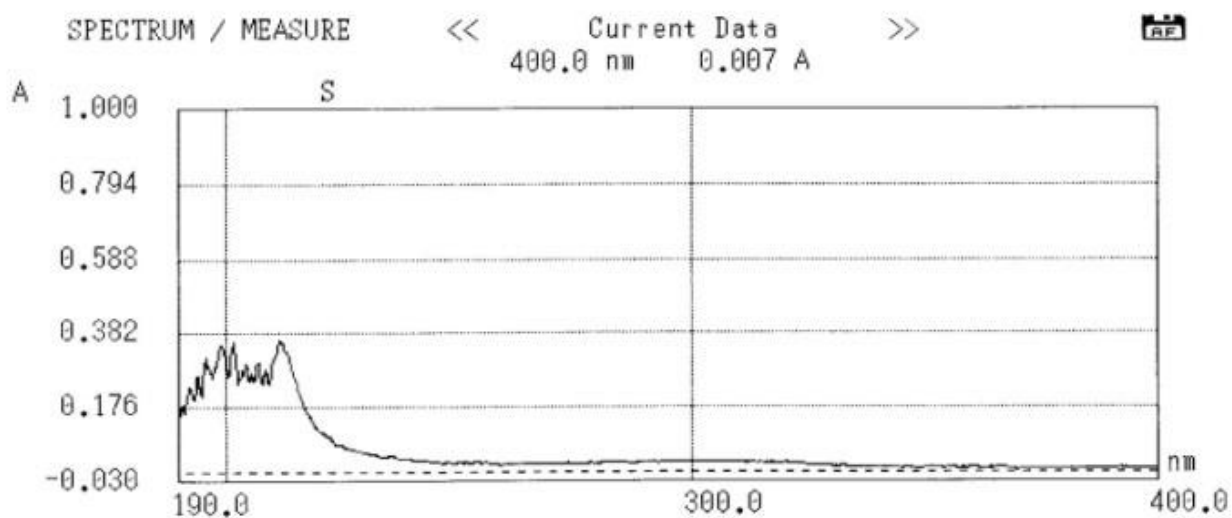

> Set sample then press [Start Scan].

⊕Enlarge/Reduce File (SP) Rec. Output Set Parameters Start Scan

| NO. | ABSCISSA | PEAK   | HEIGHT | ABSCISSA | VALLEY | HEIGHT  |
|-----|----------|--------|--------|----------|--------|---------|
| 1   | 211.4    | 0.3604 | 0.1474 | 207.8    | 0.2423 | -0.1171 |

**Figure S30. CD spectrum of compound 2**



sporulosine B (2)

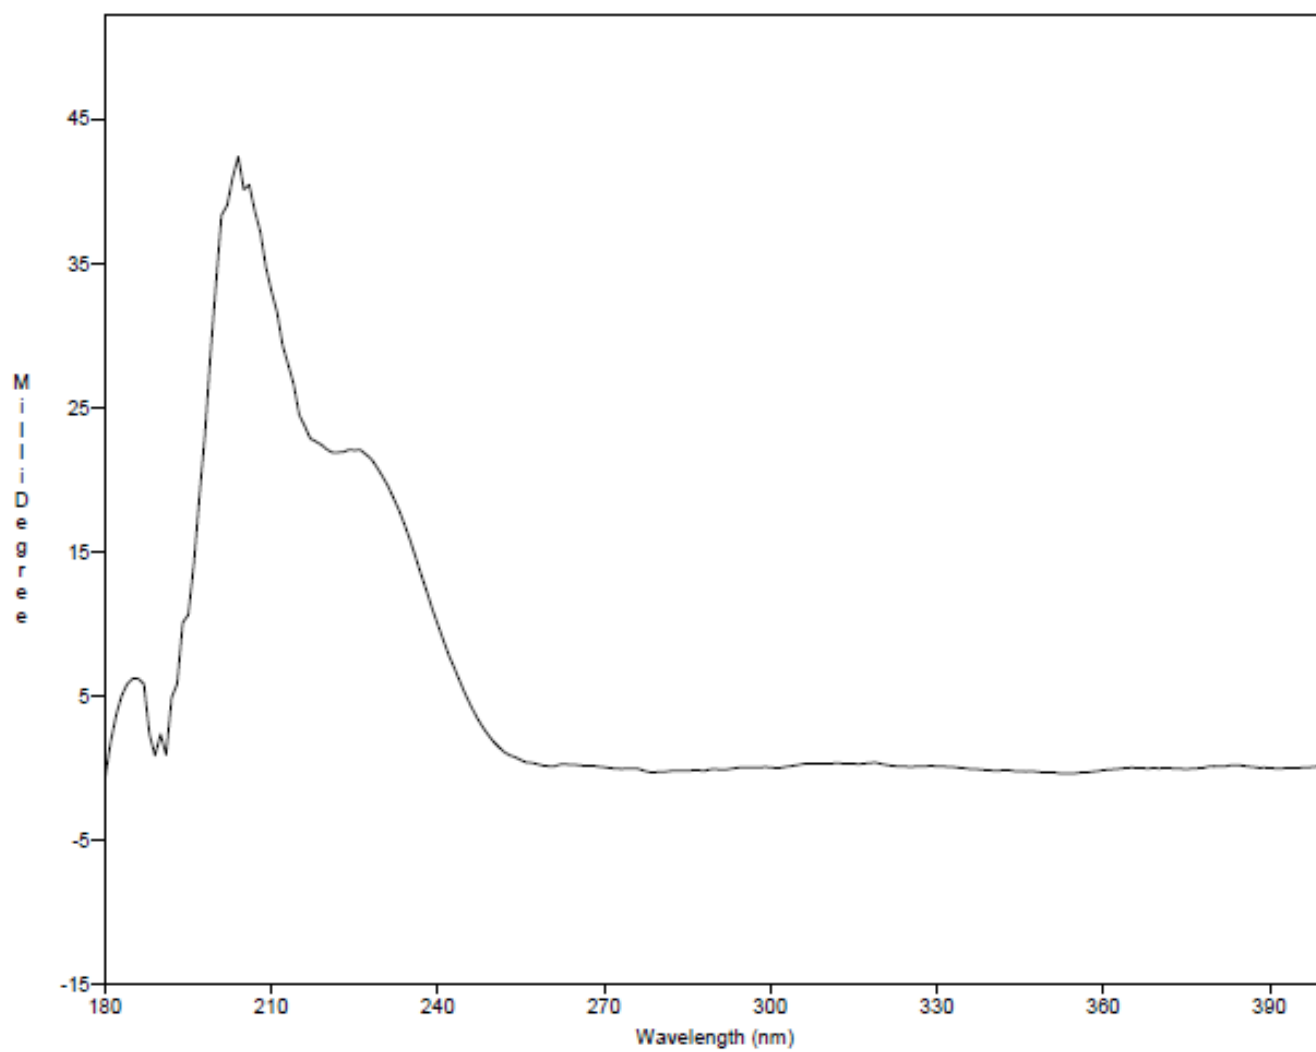

Supplement: c6ra01401a1.pdf [file c6ra01401a1.pdf]
